# Supplementary material
Source: publisher site journal article supplement (https://www.dovepress.com/article/438013)
Supplement: Supplementary file 1 [file get_supplementary_file.php]

**Supplementary Materials**

**Development and Validation of an Intracranial Hemorrhage Risk Score in Older Adults with Atrial Fibrillation Treated with Oral Anticoagulant**

Lily Gui Bessette1, Daniel E. Singer2, Ajinkya Pawar1, Vincent Wong1, Dae Hyun Kim*1,3, Kueiyu Joshua Lin1,2*

**Supplementary Materials Table S1. Inclusion/Exclusion Criteria Definitions**

| **Criteria** | **Definition** | **Measurement** |
| --- | --- | --- |
| Atrial Fibrillation | **ICD-9 Diagnosis Code:** 427.3, 427.31, 427.32 **ICD-10 Diagnosis Code**: I48, I48.0, I48.1, I48.2, I48.3, I48.4, I48.9, I48.91, I48.92 | Any Diagnosis Position, Any Care Setting |
| Valvular Disease | **ICD-9 Diagnosis Code:**  093.2, 093.20, 394, 394.0, 394.1, 394.2, 395.2, 395.9, 396, 396.0, 396.2, 396.8, 396.9, 397.0, 746.0, 746.01, 746.02, 746.2, 746.3, 746.4, 746.6, 093.21, 093.22, 093.23, 093.24, 394.9, 395, 395.0, 395.1, 396.1, 396.3, 397.1, 424.0, 424.1, 424.2, 424.3, 746.00, 746.09, 746.1, 746.5, 996.02, 996.71, V42.2, V42.3  **ICD-10 Diagnosis Code**: T82.03XA, T82.03XD, T82.03XS, T82.02XA, T82.02XD, T82.02XS, T82.221, T82.221A, T82.221D, T82.221S, T82.222, T82.222A, T82.222D, T82.222S, T82.223, T82.223A, T82.223D, T82.223S, T82.228, T82.228A, T82.228D, T82.228S, T82.01XA, T82.01XD, T82.01XS, I05.0, I05.1, I05.2, I05.9, I06, I06.1, I06.2, I06.9, I07, I07.0, I07.1, I07.2, I07.8, I07.9, I08, I08.0, I08.3, I08.8, I34, I34.1, I34.2, I34.8, I35.0, I35.2, I36.0, I36.9, I37, I37.0, I37.2, I37.8, Q22.3, Q22.4, Q22.5, Q22.6, Q22.8, Q23.0, Q23.1, Q23.2, Q23.3, Q23.4, Q23.8, Q23.9, T82.02, T82.03, T82.6XXD, I05, I05.8, I06.0, I06.8, I08.1, I08.2, I08.9, I34.0, I34.9, I35, I35.1, I35.8, I35.9, I36, I36.1, I36.2, I36.8, I37.1, I37.9, I39, Q22, Q22.0, Q22.1, Q22.2, Q22.9, Q23, T82.0, T82.01, T82.22, T82.6, T82.6XXA, T82.6XXS, Z95.2, Z95.3, Z95.4, T82.09, T82.09XA, T82.09XD, T82.09XS  **HCPCS Procedure Codes:** 33420, 33427, 33460, 33463, 33464, 0257T, 0258T, 0259T, 0262T, 33400, 33401, 33403, 33422, 33425, 33426, 33430, 33465, 33468, 33475, 33496, 33660, 33665 | Any Diagnosis Position, Any Care Setting |
| Anticoagulant | **NDC Generic Name**: WARFARIN SODIUM, APIXABAN, RIVAROXABAN, DABIGATRAN ETEXILATE MESYLATE, EDOXABAN TOSYLATE |  |

**Supplementary Materials Table S2. Outcome Definitions**

| **Outcome Name** | **Definition** | **Measurement** |
| --- | --- | --- |
| Atraumatic Intracranial Hemorrhage | **ICD-9 Diagnosis Code:**  430, 432, 432.9, 852, 852.0, 852.00, 852.04, 852.05, 852.10, 852.11, 852.12, 852.16, 852.20, 852.21, 852.22, 852.23, 852.25, 852.29, 852.3, 852.31, 852.32, 852.35, 852.36, 852.40, 852.43, 852.5, 852.51, 852.52, 852.53, 852.54, 852.59, 853.0, 853.00, 853.04, 853.05, 853.09, 853.10, 853.11, 853.13, 853.19, 431, 432.0, 432.1, 852.01, 852.02, 852.03, 852.06, 852.09, 852.1, 852.13, 852.14, 852.15, 852.19, 852.2, 852.24, 852.26, 852.30, 852.33, 852.34, 852.39, 852.4, 852.41, 852.42, 852.44, 852.45, 852.46, 852.49, 852.50, 852.55, 852.56, 853, 853.01, 853.02, 853.03, 853.06, 853.1, 853.12, 853.14, 853.15, 853.16  **ICD-10 Diagnosis Code**:  I60.0, I60.01, I60.10, I60.11, I60.3, I60.31, I60.5, I60.51, I60.52, I60.6, I60.8, I61, I61.4, I61.8, I62.1, S06.4X0D, S06.4X0S, S06.4X1, S06.4X1S, S06.4X2, S06.4X2D, S06.4X3, S06.4X3A, S06.4X4, S06.4X4A, S06.4X5S, S06.4X6, S06.4X6A, S06.4X6D, S06.4X6S, S06.4X7, S06.4X7A, S06.4X8A, S06.5X, S06.5X0, S06.5X0S, S06.5X1, S06.5X1A, S06.5X1S, S06.5X2, S06.5X2D, S06.5X2S, S06.5X3, S06.5X3A, S06.5X3D, S06.5X3S, S06.5X4, S06.5X4A, S06.5X4D, S06.5X5D, S06.5X6A, S06.5X6S, S06.5X8, S06.5X8A, S06.5X9A, S06.6, S06.6X0, S06.6X0D, S06.6X1, S06.6X1A, S06.6X1S, S06.6X2, S06.6X2D, S06.6X2S, S06.6X3, S06.6X3A, S06.6X3D, S06.6X4S, S06.6X5A, S06.6X5S, S06.6X6D, S06.6X7A, S06.6X8, S06.6X8A, S06.6X9S, I60, I60.00, I60.02, I60.1, I60.12, I60.2, I60.30, I60.32, I60.4, I60.50, I60.7, I60.9, I61.0, I61.1, I61.2, I61.3, I61.5, I61.6, I61.9, I62, I62.0, I62.00, I62.01, I62.02, I62.03, I62.9, S06.4, S06.4X, S06.4X0, S06.4X0A, S06.4X1A, S06.4X1D, S06.4X2A, S06.4X2S, S06.4X3D, S06.4X3S, S06.4X4D, S06.4X4S, S06.4X5, S06.4X5A, S06.4X5D, S06.4X8, S06.4X9, S06.4X9A, S06.4X9D, S06.4X9S, S06.5, S06.5X0A, S06.5X0D, S06.5X1D, S06.5X2A, S06.5X4S, S06.5X5, S06.5X5A, S06.5X5S, S06.5X6, S06.5X6D, S06.5X7, S06.5X7A, S06.5X9, S06.5X9D, S06.5X9S, S06.6X, S06.6X0A, S06.6X0S, S06.6X1D, S06.6X2A, S06.6X3S, S06.6X4, S06.6X4A, S06.6X4D, S06.6X5, S06.6X5D, S06.6X6, S06.6X6A, S06.6X6S, S06.6X7, S06.6X9, S06.6X9A, S06.6X9D | Primary Diagnosis Position, Inpatient Care Setting |
| Intraparenchymal hemorrhage (IPH) | **ICD-9 Diagnosis Code:** 431  **ICD-10 Diagnosis Code:** I61, I61.4, I61.8, I61.0, I61.1, I61.2, I61.3, I61.5, I61.6, I61.9 | Primary Diagnosis Position, Inpatient Care Setting |
| Subdural hemorrhage (SDH) | **ICD-9 Diagnosis Code:** 852.20, 852.21, 852.22, 852.23, 852.25, 852.29, 852.3, 852.31, 852.32, 852.35, 852.36, 432.1, 852.2, 852.24, 852.26, 852.30, 852.33, 852.34, 852.39  **ICD-10 Diagnosis Code:** S06.5X, S06.5X0, S06.5X0S, S06.5X1, S06.5X1A, S06.5X1S, S06.5X2, S06.5X2D, S06.5X2S, S06.5X3, S06.5X3A, S06.5X3D, S06.5X3S, S06.5X4, S06.5X4A, S06.5X4D, S06.5X5D, S06.5X6A, S06.5X6S, S06.5X8, S06.5X8A, S06.5X9A, I62.0, I62.00, I62.01, I62.02, I62.03, S06.5, S06.5X0A, S06.5X0D, S06.5X1D, S06.5X2A, S06.5X4S, S06.5X5, S06.5X5A, S06.5X5S, S06.5X6, S06.5X6D, S06.5X7, S06.5X7A, S06.5X9, S06.5X9D, S06.5X9S | Primary Diagnosis Position, Inpatient Care Setting |

**Supplementary Materials Table S3. AF ICH Model Predictor Definitions**

| **Predictor Name** | **Definition** |
| --- | --- |
| Number of Hospitalizations | Count of inpatient claims in past 365 days from CED |
| Number of Office visits | Count of outpatient claims in past 365 days from CED |
| Hospitalization in past 30 days | Occurrence of inpatient claim in past 30 days from CED |
| Number of Skilled nursing facility stays | Count of skilled nursing facility claims in past 365 days from CED |
| Diabetic footwear | **HCPCS Procedure Code**: A5500, A5501, A5508, A5509, A5510, A5511, A5513, A5502, A5503, A5504, A5505, A5506, A5507, A5512 |
| Walking aids and attachments | **HCPCS Procedure Code**: E0100, E0111, E0113, E0120, E0130, E0131, E0140, E0143, E0144, E0145, E0147, E0149, E0153, E0105, E0110, E0112, E0114, E0115, E0116, E0117, E0118, E0135, E0138, E0139, E0141, E0142, E0146, E0148, E0154, E0155, E0156, E0157, E0158, E0159 |
| Wheelchairs, components, and accessories | **HCPCS Procedure Code**: K0010, K0012, K0013, K0017, K0018, K0020, K0021, K0022, K0023, K0024, K0025, K0028, K0029, K0030, K0031, K0032, K0034, K0035, K0036, K0037, K0038, K0040, K0043, K0048, K0049, K0050, K0051, K0055, K0056, K0057, K0060, K0061, K0063, K0065, K0068, K0069, K0070, K0075, K0080, K0081, K0082, K0084, K0086, K0087, K0088, K0092, K0096, K0097, K0098, K0100, K0101, K0103, K0104, K0116, K0121, K0123, K0138, K0143, K0156, K0168, K0169, K0170, K0174, K0175, K0176, K0177, K0181, K0185, K0187, K0189, K0192, K0193, K0194, K0199, K0204, K0209, K0215, K0248, K0258, K0261, K0268, K0269, K0270, K0281, K0283, K0284, K0401, K0402, K0407, K0409, K0411, K0415, K0417, K0418, K0419, K0421, K0426, K0427, K0428, K0430, K0432, K0433, K0435, K0437, K0438, K0439, K0440, K0441, K0442, K0447, K0448, K0449, K0452, K0455, K0456, K0459, K0461, K0001, K0002, K0003, K0004, K0005, K0006, K0007, K0008, K0009, K0011, K0014, K0015, K0016, K0019, K0026, K0027, K0033, K0039, K0041, K0042, K0044, K0045, K0046, K0047, K0052, K0053, K0054, K0058, K0059, K0062, K0064, K0066, K0067, K0071, K0072, K0073, K0074, K0076, K0077, K0078, K0079, K0083, K0085, K0089, K0090, K0091, K0093, K0094, K0095, K0099, K0102, K0105, K0106, K0107, K0108, K0109, K0112, K0113, K0114, K0115, K0118, K0119, K0120, K0122, K0137, K0139, K0171, K0172, K0173, K0178, K0179, K0180, K0182, K0183, K0184, K0186, K0188, K0190, K0191, K0195, K0207, K0217, K0235, K0260, K0266, K0277, K0278, K0279, K0280, K0400, K0405, K0408, K0410, K0412, K0416, K0420, K0422, K0423, K0424, K0425, K0429, K0431, K0434, K0436, K0443, K0444, K0445, K0446, K0450, K0451, K0457, K0458, K0460, K0462, K0669 |
| Inhalation solutions | **HCPCS Procedure Code**: J7609, J7610, J7614, J7615, J7617, J7622, J7626, J7627, J7628, J7629, J7630, J7631, J7633, J7635, J7636, J7637, J7640, J7642, J7644, J7647, J7650, J7651, J7654, J7657, J7658, J7660, J7665, J7670, J7672, J7674, J7675, J7676, J7681, J7608, J7611, J7612, J7613, J7616, J7618, J7619, J7620, J7621, J7624, J7625, J7632, J7634, J7638, J7639, J7641, J7643, J7645, J7648, J7649, J7652, J7653, J7655, J7659, J7667, J7668, J7669, J7680, J7682, J7683, J7684 |
| Anesthesia, intrathoracic | **HCPCS Procedure Code**: 00524, 00528, 00530, 00534, 00537, 00542, 00544, 00546, 00560, 00561, 00566, 00570, 00500, 00508, 00520, 00522, 00529, 00532, 00539, 00540, 00541, 00548, 00550, 00562, 00563, 00567, 00580 |
| Anesthesia, knee and popliteal | **HCPCS Procedure Code**: 01360, 01382, 01399, 01420, 01432, 01320, 01340, 01380, 01390, 01392, 01400, 01402, 01404, 01415, 01430, 01431, 01440, 01442, 01444 |
| Congestive heart failure | **ICD-9 Diagnosis Code**: 398.91, 402.01, 402.11, 402.91, 404.01, 404.03, 404.11, 404.13, 404.91, 404.93, 428.0, 428.1, 428.2, 428.20, 428.21, 428.22, 428.23, 428.3, 428.30, 428.31, 428.32, 428.33, 428.4, 428.40, 428.41, 428.42, 428.43, 428.9, 425.0, 425.9, 429.3, 425.18, 428, 425.1, 425.3, 425.5, 425.7, 425, 425.11, 425.2, 425.4, 425.8  **ICD-10 Diagnosis Code**: I42.0, I42.4, I43, I50.1, I50.4, I50.42, I42, I42.2, I42.3, I42.6, I42.7, I42.8, I50.32, I11.0, I42.5, I42.9, I50.2, I50.20, I50.21, I50.43, A18.84, I50, I50.23, I50.3, I50.30, I50.40, I50.41, I50.9, I42.1, I50.22, I50.31, I50.33 |
| Hypertension | **ICD-9 Diagnosis Code**: 401.0, 401.1, 401.9, 402.0, 402.00, 402.01, 402.1, 402.10, 402.11, 402.9, 402.90, 402.91, 403.0, 403.00, 403.01, 403.1, 403.10, 403.11, 403.9, 403.90, 403.91, 404.0, 404.00, 404.01, 404.02, 404.03, 404.1, 404.10, 404.11, 404.12, 404.13, 404.9, 404.90, 404.91, 404.92, 404.93, 405.0, 405.01, 405.09, 405.1, 405.11, 405.19, 405.9, 405.91, 405.99  **ICD-10 Diagnosis Code**: I10, I13.2, I15.0, I15.8, I13.11, I13.10, I12.0, I13.0, I11.9, I12.9 |
| Ischemic heart disease | **ICD-9 Diagnosis Code**: 410.00, 410.01, 410.12, 410.22, 410.31, 410.40, 410.52, 410.60, 410.70, 410.71, 410.72, 410.80, 410.82, 410.91, 411.0, 411.1, 412, 414.04, 414.05, 414.4, 414.8, 410.02, 410.10, 410.11, 410.20, 410.21, 410.30, 410.32, 410.41, 410.42, 410.50, 410.51, 410.61, 410.62, 410.81, 410.90, 410.92, 411.81, 411.89, 413.0, 413.1, 413.9, 414.00, 414.01, 414.02, 414.03, 414.06, 414.07, 414.12, 414.2, 414.3, 414.9  **ICD-10 Diagnosis Code**: I20.0, I20.1, I20.8, I21.01, I21.11, I21.4, I22.0, I22.1, I22.2, I22.8, I22.9, I23.5, I23.7, I23.8, I24.1, I24.8, I25.10, I25.110, I25.119, I25.3, I25.41, I25.42, I25.5, I25.701, I25.709, I25.718, I25.720, I25.721, I25.728, I25.729, I25.730, I25.731, I25.750, I25.751, I25.760, I25.790, I25.798, I25.799, I25.811, I25.82, I25.83, I25.89, I20.9, I21.02, I21.09, I21.19, I21.21, I21.29, I21.3, I21.A1, I21.A9, I23.0, I23.1, I23.2, I23.3, I23.4, I23.6, I24.0, I24.9, I25.111, I25.118, I25.2, I25.6, I25.700, I25.708, I25.710, I25.711, I25.719, I25.738, I25.739, I25.758, I25.759, I25.761, I25.768, I25.769, I25.791, I25.810, I25.812, I25.84, I25.9 |
| Stroke | **ICD-9 Diagnosis Code**: 433.00, 433.20, 433.30, 433.90, 434.1, 434.9, 434.91, 438.19, 438.30, 438.40, 438.41, 438.51, 438.7, 438.85, 433.01, 433.1, 433.11, 433.3, 434.00, 434.10, 438.11, 438.21, 438.50, 438.6, 438.89, 433.2, 433.8, 433.80, 433.9, 436, 437.1, 438.1, 438.12, 438.13, 438.22, 438.31, 438.32, 438.42, 438.53, 438.82, 438.83, 433.10, 433.31, 433.81, 434.90, 438.10, 438.2, 438.20, 438.5, 438.52, 438.8, 438.81, 438.84, 431, 433.0, 433.21, 433.91, 434.0, 434.01, 434.11, 438.0, 438.14, 438.3, 438.4, 438.9  **ICD-10 Diagnosis Code**: G45.9, G46.6, I63.013, I63.031, I63.033, I63.232, I63.323, I63.331, I63.342, I63.349, I63.50, I63.513, I63.521, I63.522, I63.523, I63.529, I63.541, I63.8, I65.21, I65.23, I66.02, I67.1, I67.7, G46.2, I63.00, I63.012, I63.12, I63.211, I63.213, I63.219, I63.239, I63.29, I63.313, I63.319, I63.329, I63.341, I63.39, I63.411, I63.413, I63.419, I63.432, I63.433, I63.449, I63.511, I63.532, I63.543, I63.549, I63.59, I65.9, I66.03, I66.22, I66.29, I66.9, I67.4, I67.89, I67.9, I68.8, G45.4, G45.8, G46.7, I63.019, I63.032, I63.112, I63.113, I63.131, I63.20, I63.233, I63.322, I63.333, I63.339, I63.40, I63.421, I63.422, I63.429, I63.431, I63.442, I63.443, I63.533, I63.539, I63.6, I63.9, I65.01, I65.02, I65.03, I65.1, I65.29, I65.8, I66.09, I66.12, I66.23, I66.3, I66.8, I67.2, I67.5, I67.6, I67.848, G45.0, G45.1, G45.2, G46.4, G46.5, G46.8, I63.02, I63.111, I63.133, I63.139, I63.19, I63.212, I63.231, I63.30, I63.312, I63.332, I63.343, I63.49, I63.512, I63.531, I63.542, I66.19, I66.21, I67.81, I68.2, G46.0, G46.1, G46.3, I63.011, I63.039, I63.09, I63.10, I63.119, I63.132, I63.22, I63.311, I63.321, I63.412, I63.423, I63.439, I63.441, I63.519, I65.09, I65.22, I66.01, I66.11, I66.13, I67.82, I67.841, I68.0 |
| Transient ischemic attack | **ICD-9 Diagnosis Code**: 435.1, 435.9, 435, 435.0, 435.2, 435.3, 435.8  **ICD-10 Diagnosis Code**: G45.1, G45.2, G45, G45.0, G45.3, G45.4, G45.8, G45.9 |
| Alcohol use disorder | **ICD-9 Diagnosis Code**: 291.2, 291.5, 291.82, 303.00, 303.91, 303.92, 305.00, 305.02, 305.03, 357.5, 535.3, 571.0, 571.1, 571.3, 790.3, V11.3, 291, 291.0, 291.1, 291.3, 291.4, 291.8, 291.81, 291.89, 291.9, 303, 303.0, 303.01, 303.02, 303.03, 303.9, 303.90, 303.93, 305.0, 305.01, 425.5, 571.2, E860.0  **ICD-10 Diagnosis Code**: F10, F10.11, F10.12, F10.120, F10.121, F10.14, F10.150, F10.151, F10.18, F10.180, F10.181, F10.182, F10.19, F10.20, F10.221, F10.229, F10.23, F10.231, F10.232, F10.25, F10.251, F10.259, F10.27, F10.28, F10.281, F10.29, F10.92, F10.920, F10.921, F10.929, F10.94, F10.950, F10.951, F10.959, F10.96, F10.981, F10.988, F10.99, F10.1, F10.10, F10.129, F10.15, F10.159, F10.188, F10.2, F10.21, F10.22, F10.220, F10.230, F10.239, F10.24, F10.250, F10.26, F10.280, F10.282, F10.288, F10.9, F10.95, F10.97, F10.98, F10.980, F10.982, Z71.4, Z71.41 |
| Anemia | **ICD-9 Diagnosis Code**: 281.4, 282, 283.9, 284.0, 285.29, 280, 281.1, 281.2, 282.2, 282.8, 283, 283.1, 283.19, 284, 284.89, 285.1, 285.2, 285.9, 280.1, 281.3, 281.8, 282.3, 283.10, 280.0, 280.8, 280.9, 281.0, 281.9, 283.0, 284.09, 285, 285.21, 285.22, 285.3, 285.8, 281, 282.9, 284.8, 284.9, 285.0  **ICD-9 Diagnosis Code**: 280, 280.0, 280.1, 280.8, 280.9, 281, 281.0, 281.1, 281.2, 281.3, 281.4, 281.8, 281.9, 282, 282.2, 282.3, 282.8, 282.9, 283, 283.0, 283.1, 283.10, 283.19, 283.9, 284, 284.0, 284.09, 284.8, 284.89, 284.9, 285, 285.0, 285.1, 285.2, 285.21, 285.22, 285.29, 285.3, 285.8, 285.9 |
| Dementia | **ICD-9 Diagnosis Code**: 290.0, 290.1, 290.11, 290.13, 290.20, 290.21, 290.42, 290.43, 294.11, 294.21, 294.8, 331.7, 290.12, 290.3, 290.40, 290.41, 294.0, 294.10, 294.20, 331.0, 331.11, 331.19, 331.2, 797  **ICD-10 Diagnosis Code**: F01.50, F01.51, F03.91, G30.1, G30.8, G30.9, G31.01, G31.09, F02.80, F02.81, F03.90, G30.0, F01.5, F02.8, F03.9, G31.0 |
| Diabetes | **ICD-9 Diagnosis Code**: 249.00, 249.10, 249.11, 249.40, 249.41, 249.50, 249.51, 249.60, 249.61, 249.81, 249.91, 250.01, 250.02, 250.10, 250.11, 250.13, 250.20, 250.32, 250.42, 250.51, 250.61, 250.63, 250.70, 250.72, 250.73, 250.83, 249.01, 249.20, 249.21, 249.30, 249.31, 249.70, 249.71, 249.80, 249.90, 250.00, 250.03, 250.12, 250.21, 250.22, 250.23, 250.30, 250.31, 250.33, 250.40, 250.41, 250.43, 250.50, 250.52, 250.53, 250.60, 250.62, 250.71, 250.80, 250.81, 250.82, 250.90, 362.01, 362.02, 362.03, 362.06, 250.91, 250.92, 250.93, 357.2, 362.04, 362.05, 366.41  **ICD-10 Diagnosis Code**: E08.00, E08.10, E08.11, E08.21, E08.29, E08.311, E08.319, E08.321, E08.3211, E08.3212, E08.329, E08.3291, E08.3292, E08.331, E08.339, E08.3392, E08.3393, E08.3413, E08.3419, E08.3491, E08.3493, E08.3499, E08.351, E08.3512, E08.3513, E08.3522, E08.3523, E08.3529, E08.3533, E08.3539, E08.3543, E08.3549, E08.3551, E08.3552, E08.36, E08.37X3, E08.39, E08.42, E08.52, E08.610, E08.620, E08.621, E08.622, E08.628, E08.630, E08.641, E08.8, E09.01, E09.29, E09.321, E09.3212, E09.3213, E09.3219, E09.3291, E09.3292, E09.3293, E09.331, E09.3313, E09.339, E09.3419, E09.3493, E09.3499, E09.351, E09.3511, E09.3512, E09.3513, E09.3519, E09.3522, E09.3523, E09.3532, E09.3542, E09.3552, E09.3553, E09.359, E09.3593, E09.36, E09.37X1, E09.39, E09.42, E09.43, E09.51, E09.52, E09.59, E09.610, E09.620, E09.622, E09.630, E09.649, E09.69, E09.8, E10.22, E10.29, E10.321, E10.3211, E10.3212, E10.329, E10.3291, E10.3299, E10.3311, E10.3312, E10.3319, E10.339, E10.3391, E10.3392, E10.3399, E10.3419, E10.349, E10.3491, E10.3492, E10.351, E10.3511, E10.3512, E10.3519, E10.37X1, E10.37X3, E10.37X9, E10.39, E10.40, E10.43, E10.49, E10.51, E10.52, E10.59, E10.610, E10.620, E10.622, E10.628, E08.01, E08.22, E08.3213, E08.3219, E08.3293, E08.3299, E08.3311, E08.3312, E08.3313, E08.3319, E08.3391, E08.3399, E08.341, E08.3411, E08.3412, E08.349, E08.3492, E08.3511, E08.3519, E08.3521, E08.3531, E08.3532, E08.3541, E08.3542, E08.3553, E08.3559, E08.359, E08.3591, E08.3592, E08.3593, E08.3599, E08.37X1, E08.37X2, E08.37X9, E08.40, E08.41, E08.43, E08.44, E08.49, E08.51, E08.59, E08.618, E08.638, E08.649, E08.65, E08.69, E08.9, E09.00, E09.10, E09.11, E09.21, E09.22, E09.311, E09.319, E09.3211, E09.329, E09.3299, E09.3311, E09.3312, E09.3319, E09.3391, E09.3393, E09.3399, E09.341, E09.3412, E09.3413, E09.349, E09.3491, E09.3533, E09.3551, E09.3591, E09.3592, E09.3599, E09.37X9, E09.40, E09.41, E09.44, E09.49, E09.618, E09.621, E09.628, E09.638, E09.641, E09.65, E09.9, E10.10, E10.11, E10.21, E10.311, E10.319, E10.3213, E10.3219, E10.3292, E10.3293, E10.331, E10.3313, E10.3393, E10.341, E10.3411, E10.3412, E10.3413, E10.3493, E10.3499, E10.3513, E10.359, E10.36, E10.37X2, E10.41, E10.42, E10.44, E10.618, E10.621, E10.630, E10.649, E10.69, E10.8, E10.9, E11.00, E11.10, E11.11, E11.22, E11.319, E11.321, E11.3212, E11.329, E11.3293, E11.331, E11.3312, E11.3313, E11.339, E11.3391, E11.3393, E11.3399, E11.3411, E11.3413, E11.3419, E11.349, E11.3491, E11.3492, E11.3511, E11.3512, E11.3521, E11.3522, E11.3523, E11.3529, E11.3531, E11.3532, E11.3533, E11.3551, E11.3552, E11.3553, E11.3593, E11.37X1, E11.37X2, E11.37X3, E11.37X9, E11.40, E11.43, E11.44, E11.49, E11.52, E11.59, E11.618, E11.622, E11.628, E11.630, E11.641, E11.649, E11.9, E13.00, E13.21, E13.22, E13.29, E13.311, E13.319, E13.3211, E13.3291, E13.3292, E13.331, E13.3312, E13.3319, E13.339, E13.3391, E13.3392, E13.3399, E13.3411, E13.3412, E13.3493, E13.3511, E13.3521, E13.3522, E13.3523, E13.3531, E13.3533, E13.3539, E13.3542, E13.3549, E13.3551, E13.3552, E13.3553, E13.3559, E13.36, E13.40, E13.51, E13.52, E13.59, E13.610, E13.618, E13.621, E13.622, E13.628, E13.630, E13.641, E13.649, E13.65, E10.638, E10.641, E10.65, E11.01, E11.21, E11.29, E11.311, E11.3211, E11.3213, E11.3219, E11.3291, E11.3292, E11.3299, E11.3311, E11.3319, E11.3392, E11.341, E11.3412, E11.3493, E11.3499, E11.351, E11.3513, E11.3519, E11.3539, E11.3541, E11.3542, E11.3543, E11.3549, E11.3559, E11.359, E11.3591, E11.3592, E11.3599, E11.36, E11.39, E11.41, E11.42, E11.51, E11.610, E11.620, E11.621, E11.638, E11.65, E11.69, E11.8, E13.01, E13.10, E13.11, E13.321, E13.3212, E13.3213, E13.3219, E13.329, E13.3293, E13.3299, E13.3311, E13.3313, E13.3393, E13.341, E13.3413, E13.3419, E13.349, E13.3491, E13.3492, E13.3499, E13.351, E13.3512, E13.3513, E13.3519, E13.3529, E13.3532, E13.3541, E13.3543, E13.359, E13.39, E13.41, E13.42, E13.43, E13.44, E13.49, E13.620, E13.638, E13.69, E13.8, E13.9 |
| Hip/Pelvic fracture | **ICD-9 Diagnosis Code**: 733.14, 733.97, 808.0, 808.3, 808.41, 808.44, 808.49, 808.51, 808.52, 808.53, 808.59, 808.9, 820.00, 820.01, 820.02, 820.03, 820.11, 820.13, 820.20, 820.22, 733.15, 733.96, 733.98, 808.1, 808.2, 808.42, 808.43, 808.54, 808.8, 820.09, 820.10, 820.12, 820.19, 820.21, 820.30, 820.32, 820.8, 820.9, 820.31  **ICD-10 Diagnosis Code**: S32.481B, S32.482A, S32.483A, S32.484B, S32.485B, S32.486A, S32.491B, S32.492B, S32.499A, S32.499B, S32.501A, S32.501B, S32.502A, S32.502B, S32.512A, S32.512B, S32.519B, S32.591A, S32.591B, S32.592A, S32.592B, S32.599A, S32.599B, S32.601A, S32.609B, S32.611A, S32.612A, S32.615A, S32.615B, S32.616B, S32.691B, S32.699A, S32.811B, S32.82XA, S32.9XXA, S32.9XXB, S72.002B, S72.002C, S72.011A, S72.011B, S72.019A, S72.019B, S72.021A, S72.021C, S72.022A, S72.023B, S72.023C, S72.024B, S72.025C, S72.026C, S72.031B, S72.032A, S72.032C, S72.033A, S72.033C, S72.034A, S72.035A, S72.036B, S72.036C, S72.041A, S72.041C, S72.042A, S72.043B, S72.045B, S72.046B, S72.046C, S72.051B, S72.052B, S72.059B, S72.061A, S72.061B, S72.062C, S72.063A, S72.063C, S72.091A, S72.091C, S72.099A, S72.099B, S72.101A, S72.101B, S72.102A, S72.102B, S72.102C, S72.109A, S72.109B, S72.109C, S72.111B, S72.112A, S72.112B, S72.112C, S72.113B, S72.114A, S72.114C, S72.115A, S72.115B, S72.115C, S72.116B, S72.121B, S72.122B, S72.123C, S72.125B, S72.125C, S72.126A, S72.126C, S72.131B, S72.131C, S72.132B, S72.133A, S72.133B, S72.133C, S72.134B, S72.135B, S72.135C, S72.136B, S72.141B, S72.141C, S72.142C, S72.143B, S72.144A, S72.144C, S72.145A, S72.145B, S72.145C, S72.146A, S72.22XC, S72.23XC, S72.24XB, S72.24XC, S72.25XB, S79.002A, S79.009A, S79.011A, S79.012A, S79.019A, S32.482B, S32.483B, S32.484A, S32.485A, S32.486B, S32.491A, S32.492A, S32.509A, S32.509B, S32.511A, S32.511B, S32.519A, S32.601B, S32.602A, S32.602B, S32.609A, S32.611B, S32.612B, S32.613A, S32.613B, S32.614A, S32.614B, S32.616A, S32.691A, S32.692A, S32.692B, S32.699B, S32.810A, S32.810B, S32.811A, S32.82XB, S32.89XA, S32.89XB, S72.001A, S72.001B, S72.001C, S72.002A, S72.009A, S72.009B, S72.009C, S72.011C, S72.012A, S72.012B, S72.012C, S72.019C, S72.021B, S72.022B, S72.022C, S72.023A, S72.024A, S72.024C, S72.025A, S72.025B, S72.026A, S72.026B, S72.031A, S72.031C, S72.032B, S72.033B, S72.034B, S72.034C, S72.035B, S72.035C, S72.036A, S72.041B, S72.042B, S72.042C, S72.043A, S72.043C, S72.044A, S72.044B, S72.044C, S72.045A, S72.045C, S72.046A, S72.051A, S72.051C, S72.052A, S72.052C, S72.059A, S72.059C, S72.061C, S72.062A, S72.062B, S72.063B, S72.064A, S72.064B, S72.064C, S72.065A, S72.065B, S72.065C, S72.066A, S72.066B, S72.066C, S72.091B, S72.092A, S72.092B, S72.092C, S72.099C, S72.101C, S72.111A, S72.111C, S72.113A, S72.113C, S72.114B, S72.116A, S72.116C, S72.121A, S72.121C, S72.122A, S72.122C, S72.123A, S72.123B, S72.124A, S72.124B, S72.124C, S72.125A, S72.126B, S72.131A, S72.132A, S72.132C, S72.134A, S72.134C, S72.135A, S72.136A, S72.136C, S72.141A, S72.142A, S72.142B, S72.143A, S72.143C, S72.144B, S72.146B, S72.146C, S72.21XA, S72.21XB, S72.21XC, S72.22XA, S72.22XB, S72.23XA, S72.23XB, S72.24XA, S72.25XA, S72.25XC, S72.26XA, S72.26XB, S72.26XC, S79.001A, S79.091A, S79.092A, S79.099A, M80.851A, M80.852A, M84.350A, M84.352A, M84.359A, M84.452A, M84.453A, M84.459A, M84.550A, M84.551A, M84.650A, M84.651A, M84.652A, M84.653A, M84.659A, S32.301A, S32.309A, S32.311A, S32.311B, S32.312A, S32.312B, S32.316A, S32.316B, S32.391A, S32.391B, S32.392A, S32.392B, S32.401B, S32.409A, S32.409B, S32.411B, S32.412A, S32.412B, S32.413A, S32.413B, S32.415A, S32.415B, S32.416A, S32.424A, S32.424B, S32.425A, S32.426A, S32.426B, S32.432A, S32.432B, S32.433B, S32.435A, S32.441A, S32.442A, S32.443B, S32.444A, S32.445A, S32.445B, S32.446A, S32.451A, S32.452A, S32.454A, S32.454B, S32.455A, S32.455B, S32.456B, S32.461B, S32.462B, S32.463A, S32.463B, S32.464A, S32.464B, S32.465A, S32.465B, S32.466B, S32.471A, S32.472A, S32.472B, S32.474A, S32.481A, M80.051A, M80.052A, M80.059A, M80.859A, M84.351A, M84.353A, M84.451A, M84.552A, M84.553A, M84.559A, S32.301B, S32.302A, S32.302B, S32.309B, S32.313A, S32.313B, S32.314A, S32.314B, S32.315A, S32.315B, S32.399A, S32.399B, S32.401A, S32.402A, S32.402B, S32.411A, S32.414A, S32.414B, S32.416B, S32.421A, S32.421B, S32.422A, S32.422B, S32.423A, S32.423B, S32.425B, S32.431A, S32.431B, S32.433A, S32.434A, S32.434B, S32.435B, S32.436A, S32.436B, S32.441B, S32.442B, S32.443A, S32.444B, S32.446B, S32.451B, S32.452B, S32.453A, S32.453B, S32.456A, S32.461A, S32.462A, S32.466A, S32.471B, S32.473A, S32.473B, S32.474B, S32.475A, S32.475B, S32.476A, S32.476B |
| GI Bleed | **ICD-9 Diagnosis Code**: 531.0, 531.00, 531.01, 531.2, 531.20, 531.21, 531.4, 531.40, 531.41, 531.6, 531.60, 531.61, 532.0, 532.00, 532.01, 532.2, 532.20, 532.21, 532.4, 532.40, 532.41, 532.6, 532.60, 532.61, 533.0, 533.00, 533.01, 533.2, 533.20, 533.21, 533.4, 533.40, 533.41, 533.6, 533.60, 533.61, 534.0, 534.00, 534.01, 534.2, 534.20, 534.21, 534.4, 534.40, 534.41, 534.6, 534.60, 534.61, 578.0  **ICD-9 Diagnosis Code**: 562.02, 562.03, 562.12, 562.13, 569.3, 578.1, 578.9  **ICD-9 Diagnosis Code**: 423.0, 432.0, 531.00, 531.20, 532.2, 532.20, 532.6, 532.61, 533.40, 534.00, 534.2, 534.20, 534.4, 534.40, 534.41, 562.03, 569.86, 578.0, 719.1, 719.16, 719.19, 784.8, 786.30, 432.9, 459.0, 531.2, 531.21, 531.4, 531.40, 531.61, 534.0, 534.21, 562.13, 569.83, 578.9, 599.71, 599.72, 786.3, 786.39, 531.01, 531.41, 532.0, 532.00, 532.4, 532.60, 533.2, 533.20, 533.4, 533.41, 533.6, 533.61, 534.01, 534.6, 534.60, 534.61, 562.02, 569.3, 569.85, 599.7, 719.12, 719.15, 784.7, 786.31, 430, 531.0, 531.60, 532.01, 532.21, 533.00, 533.60, 562.12, 568.81, 578.1, 599.70, 431, 432.1, 531.6, 532.40, 532.41, 533.0, 533.01, 533.21, 719.10, 719.11, 719.13, 719.14, 719.17, 719.18, K92.2  **ICD-10 Diagnosis Code**: I60.2, I60.31, I60.50, I61.8, K25.2, K25.4, K25.6, K28.2, K28.4, K62.5, M25.051, R04.1, I60.52, I62.02, K26.0, K26.2, K27.6, K57.31, K57.91, K63.1, M25.011, M25.019, M25.022, M25.031, M25.032, M25.059, M25.072, R04.0, R31.1, R31.21, R31.29, I60.00, I60.02, I60.10, I60.30, I60.9, I61.0, I61.1, I61.5, I61.9, I62.01, I62.9, K57.01, K57.41, K66.1, K92.1, M25.012, M25.041, M25.049, M25.061, R04.2, R04.9, R31.2, R31.9, R58, I31.2, I60.4, I60.6, I60.7, I61.3, I61.6, I62.00, I62.1, K25.0, K27.0, K57.11, K57.13, K57.21, K57.51, K57.81, K57.93, K92.0, M25.00, M25.039, M25.052, M25.071, M25.073, M25.076, M25.08, R04, I60.01, I60.11, I60.12, I60.32, I60.51, I60.8, I61.2, I61.4, I62.03, K26.4, K26.6, K27.2, K27.4, K28.0, K28.6, K55.21, K56.60, K57.33, K57.53, K63.81, K92.2, M25.021, M25.029, M25.042, M25.062, M25.069, M25.074, M25.075, R04.8, R04.81, R04.89, R31, R31.0  **ICD-9 Procedure Code**: 44.43  **ICD-10 Procedure Code**: 0W3P8ZZ  **HCPCS Procedure Code**: 43255 |
| Home oxygen use | **ICD-9 Diagnosis Code**: V46.2  **ICD-10 Diagnosis Code**: Z99.81 |
| Acute renal failure | **ICD-9 Diagnosis Code**: 584, 584.5, 584.6, 584.7, 584.8, 584.9  **ICD-10 Diagnosis Code**: N17.8, N17.9, N17.2, N17.0, N19, N17.1 |
| CKD 3-4 | **ICD-9 Diagnosis Code**: 585.3, 585.4, 585.9  **ICD-10 Diagnosis Code**: N18.3, N18.9, N18.4 |
| Obesity | **ICD-9 Diagnosis Code**: 278.0, 278.00, 278.01, 278.03, V85.3, V85.30, V85.32, V85.33, V85.37, V85.4, V85.41, V85.42, V85.43, V85.44, V85.31, V85.34, V85.35, V85.36, V85.38, V85.39, V85.45  **ICD-10 Diagnosis Code**: E66.09, E66.1, E66.8, E66.9, Z68.30, Z68.31, Z68.33, Z68.34, Z68.37, Z68.42, Z68.44, Z68.45, E66.01, E66.2, Z68.32, Z68.35, Z68.36, Z68.38, Z68.39, Z68.41, Z68.43 |
| Syncope | **ICD-9 Diagnosis Code**: 780.2, 992.1  **ICD-10 Diagnosis Code**: R55 |
| Anticoagulants, injectable | **NDC Generic Name**: DALTEPARIN SODIUM,PORCINE, ENOXAPARIN SODIUM, FONDAPARINUX SODIUM |
| Antiplatelet | **NDC Generic Name**: ASPIRIN, TICAGRELOR, CLOPIDOGREL BISULFATE, ASPIRIN (CALCIUM CARB & MAGNESIUM BUFFERS)/PRAVASTATIN, ASPIRIN/ACETAMINOPHEN, ASPIRIN/ACETAMINOPHEN/CAFFEINE, ASPIRIN/ACETAMINOPHEN/CAFFEINE/CALCIUM, ASPIRIN/ACETAMINOPHEN/CAFFEINE/POTASSIUM, ASPIRIN/ACETAMINOPHEN/CALCIUM CARBONATE, ASPIRIN/ACETAMINOPHEN/MAGNESIUM/ALUMINUM HYDROXIDE/CAFFEINE, ASPIRIN/CAFFEINE, ASPIRIN/CALCIUM CARBONATE, ASPIRIN/CALCIUM CARBONATE/MAGNESIUM, ASPIRIN/CALCIUM CARBONATE/MAGNESIUM/ALUMINUM HYDROXIDE, ASPIRIN/CODEINE PHOSPHATE, ASPIRIN/DIPHENHYDRAMINE CITRATE, ASPIRIN/DIPHENHYDRAMINE HCL, ASPIRIN/DIPHENHYDRAMINE/SODIUM BICARBONATE/CITRIC ACID, ASPIRIN/DIPYRIDAMOLE, ASPIRIN/MAGNESIUM CARBONATE/DIHYDROXYALUMINUM AMINOACETATE, ASPIRIN/MAGNESIUM HYDROXIDE/ALUMINUM HYDROXIDE, ASPIRIN/MAGNESIUM HYDROXIDE/ALUMINUM HYDROXIDE/CAFFEINE, ASPIRIN/MEPROBAMATE, ASPIRIN/SALICYLAMIDE/ACETAMINOPHEN/CAFFEINE, ASPIRIN/SALICYLAMIDE/CAFFEINE, ASPIRIN/SODIUM BICARBONATE/CITRIC ACID, BUTALBITAL/ASPIRIN/CAFFEINE, CARISOPRODOL/ASPIRIN, CHLORPHENIRAMINE MAL/PHENYLEPHRINE/D-METHORPHAN HB/ASPIRIN, CHLORPHENIRAMINE MALEATE/PHENYLEPHRINE BITARTRATE/ASPIRIN, CINNAMEDRINE HCL/ASPIRIN/CAFFEINE, CODEINE PHOSPHATE/BUTALBITAL/ASPIRIN/CAFFEINE, CODEINE PHOSPHATE/CARISOPRODOL/ASPIRIN, CODEINE/ASPIRIN/SALICYLAMIDE/ACETAMINOPHEN/CAFFEINE, DIHYDROCODEINE BITARTRATE/ASPIRIN/CAFFEINE, DIHYDROCODEINE/ASPIRIN/CAFFEINE, EPHEDRINE/ASPIRIN/ACETANILIDE/CAFFEINE, HYDROCODONE BITARTRATE/ASPIRIN, METHOCARBAMOL/ASPIRIN, ORPHENADRINE CITRATE/ASPIRIN/CAFFEINE, OXYCODONE HCL/ASPIRIN, OXYCODONE HCL/OXYCODONE TEREPHTHALATE/ASPIRIN, OXYCODONE/ASPIRIN, PENTAZOCINE HCL/ASPIRIN, PHENYLEPHRINE HCL/ASPIRIN, PHENYLPROPANOLAMINE BITARTRATE/ASPIRIN, PHENYLPROPANOLAMINE BITARTRATE/ASPIRIN/CHLORPHENIRAMINE, PHENYLPROPANOLAMINE HCL/ASPIRIN, PHENYLPROPANOLAMINE HCL/ASPIRIN/CHLORPHENIRAMINE, PHENYLPROPANOLAMINE HCL/ASPIRIN/CHLORPHENIRAMINE/CAFFEINE, PHENYLPROPANOLAMINE HCL/ASPIRIN/DIPHENHYDRAMINE, PROPOXYPHENE HCL/ASPIRIN/CAFFEINE, PSEUDOEPHEDRINE HCL/ASPIRIN/CHLORPHENIRAMINE, PRASUGREL HCL |
| Calcium channel blockers | **NDC Generic Name**: ISRADIPINE, NIFEDIPINE, NIMODIPINE, NISOLDIPINE  **NDC Brand Name**: ADALAT, CALAN, CARDENE, CARDIZEM, CLEVIPREX, COVERA-HS, DILT-CD, DYNACIRC, ISRADIPINE, NIFEDIPINE, NIMODIPINE, NISOLDIPINE, NORVASC, NYMALIZE, PLENDIL, PROCARDIA, SULAR, TIAZAC, VASCOR, VERELAN |
| SSRI/SNRI | **NDC Generic Name**: CITALOPRAM HYDROBROMIDE, DULOXETINE HCL, ESCITALOPRAM OXALATE, FLUOXETINE, FLUOXETINE HCL, FLUOXETINE HCL/DIETARY SUPPLEMENT,MISC COMB17, FLUOXETINE HCL/DIETARY SUPPLEMENT,MISC.COMBO8, FLUVOXAMINE MALEATE, OLANZAPINE/FLUOXETINE HCL, PAROXETINE HCL, PAROXETINE MESYLATE, SERTRALINE HCL, DESVENLAFAXINE, DESVENLAFAXINE FUMARATE, DESVENLAFAXINE SUCCINATE, VENLAFAXINE HCL, LEVOMILNACIPRAN HYDROCHLORIDE |
| Bronchodilators | **NDC Generic Name**: ALBUTEROL, ALBUTEROL SULFATE, IPRATROPIUM BROMIDE/ALBUTEROL SULFATE, LEVALBUTEROL HCL, LEVALBUTEROL TARTRATE, METAPROTERENOL SULFATE, PIRBUTEROL ACETATE, SALMETEROL XINAFOATE, FLUTICASONE PROPIONATE/SALMETEROL XINAFOATE, FORMOTEROL FUMARATE, ARFORMOTEROL TARTRATE, BUDESONIDE/FORMOTEROL FUMARATE, MOMETASONE FUROATE/FORMOTEROL FUMARATE |
| Dementia medications | **NDC Generic Name**: DONEPEZIL HCL, MEMANTINE HCL/DONEPEZIL HCL, RIVASTIGMINE, RIVASTIGMINE TARTRATE, GALANTAMINE HBR, MEMANTINE HCL |
| Insulin | **NDC Generic Name**: DILUENT,INSULIN ASPART COMBINATION #1, INSULIN ASPART, INSULIN ASPART PROTAMINE HUMAN/INSULIN ASPART, INSULIN DETEMIR, INSULIN GLARGINE,HUMAN RECOMBINANT ANALOG, INSULIN GLULISINE, INSULIN LISPRO, INSULIN LISPRO PROTAMINE & INSULIN LISPRO |
| Sulfonylurea | **NDC Generic Name**: CHLORPROPAMIDE, GLIMEPIRIDE, GLIPIZIDE, GLIPIZIDE/METFORMIN HCL, GLYBURIDE, GLYBURIDE,MICRONIZED, GLYBURIDE/METFORMIN HCL, PIOGLITAZONE HCL/GLIMEPIRIDE, ROSIGLITAZONE MALEATE/GLIMEPIRIDE, TOLAZAMIDE, TOLBUTAMIDE |

All predictors were measured in any diagnosis/procedure position and any care setting.

**Supplementary Materials Table S4. HAS-BLED Score Predictors**

| **Measure** | **Definition** | **Score Component** |
| --- | --- | --- |
| Elderly | Age 65 | +1 |
| Abnormal Liver Function | **ICD-9 Diagnosis Code:** 794.8  **ICD-10 Diagnosis Code:** R94.5 | +1 |
| Abnormal Renal Function | **ICD-9 Diagnosis Code:** 794.4  **ICD-10 Diagnosis Code:** R94.4 | +1 |
| Stroke | **ICD-9 Diagnosis Code:** 433.01, 433.21, 433.81, 433.91, 434.11, 433.11, 433.31, 434.01, 434.91  **ICD-10 Diagnosis Code:** I63.019, I63.032, I63.113, I63.119, I63.132, I63.133, I63.20, I63.212, I63.22, I63.231, I63.232, I63.233, I63.239, I63.30, I63.312, I63.321, I63.332, I63.341, I63.343, I63.349, I63.39, I63.411, I63.413, I63.419, I63.421, I63.432, I63.433, I63.439, I63.443, I63.49, I63.512, I63.521, I63.522, I63.523, I63.529, I63.531, I63.542, I63.549, I63.8, I63.00, I63.011, I63.012, I63.013, I63.02, I63.031, I63.033, I63.039, I63.09, I63.10, I63.111, I63.112, I63.12, I63.131, I63.139, I63.19, I63.211, I63.213, I63.219, I63.29, I63.311, I63.313, I63.319, I63.322, I63.323, I63.329, I63.331, I63.333, I63.339, I63.342, I63.40, I63.412, I63.422, I63.423, I63.429, I63.431, I63.441, I63.442, I63.449, I63.50, I63.511, I63.513, I63.519, I63.532, I63.533, I63.539, I63.541, I63.543, I63.59, I63.6, I63.9 | +1 |
| Hypertension | **ICD-9 Diagnosis Code:** 401.1, 402.0, 402.00, 402.91, 403.01, 403.11, 403.9, 403.90, 404.00, 404.01, 404.02, 404.03, 404.9, 404.90, 404.93, 405.09, 405.1, 405.11, 405.9, 405.91, 401.0, 401.9, 402.01, 402.1, 402.10, 402.11, 402.9, 402.90, 403.0, 403.00, 403.1, 403.10, 403.91, 404.0, 404.1, 404.10, 404.11, 404.12, 404.13, 404.91, 404.92, 405.0, 405.01, 405.19, 405.99  **ICD-10 Diagnosis Code:** I15.1, I15.2, I15.8, I16.0, I16.1, I16.9, N26.2, I10, I11.0, I11.9, I12.0, I12.9, I13.0, I13.10, I13.11, I13.2, I15.0, I15.9 | +1 |
| Bleeding History or Predisposition | **ICD-9 Diagnosis Code:** 280.0, 280.8, 281.0, 281.1, 281.2, 281.3, 281.8, 281.9, 282.1, 282.41, 282.49, 282.61, 282.62, 282.63, 282.69, 282.8, 283.2, 283.9, 284.0, 284.09, 284.1, 284.19, 285.0, 285.1, 285.2, 285.3, 285.8, 285.9, 280.1, 280.9, 281.4, 282.0, 282.2, 282.3, 282.4, 282.40, 282.42, 282.43, 282.44, 282.45, 282.46, 282.47, 282.5, 282.6, 282.60, 282.64, 282.68, 282.7, 282.9, 283.0, 283.1, 283.10, 283.11, 283.19, 284.01, 284.11, 284.12, 284.2, 284.8, 284.81, 284.89, 284.9, 285.21, 285.22, 285.29  **ICD-10 Diagnosis Code:** D50.0, D50.9, D51.0, D51.1, D51.2, D51.3, D51.8, D51.9, D52.8, D53.0, D55.2, D55.8, D56.0, D57.01, D57.1, D57.219, D57.411, D57.811, D57.812, D58.1, D59.0, D59.3, D59.4, D60.0, D60.1, D61.01, D61.1, D61.818, D61.82, D63.8, D64.0, D64.1, D64.4, D64.81, D64.89, D50.1, D50.8, D52.0, D52.1, D52.9, D53.1, D53.2, D53.8, D53.9, D55.0, D55.1, D55.3, D55.9, D56.1, D56.2, D56.3, D56.4, D56.5, D56.8, D56.9, D57.00, D57.02, D57.20, D57.211, D57.212, D57.3, D57.40, D57.412, D57.419, D57.80, D57.819, D58.0, D58.2, D58.8, D58.9, D59.1, D59.2, D59.5, D59.6, D59.8, D59.9, D60.8, D60.9, D61.09, D61.2, D61.3, D61.810, D61.811, D61.89, D61.9, D63.0, D63.1, D64.2, D64.3, D64.9, D62 | +1 |
| Concomitant drugs/alcohol | **ICD-9 Diagnosis Code:** 303.93, 305.03, V11.3, 303.00, 303.01, 303.02, 303.03, 303.90, 303.91, 303.92, 305.00, 305.01, 305.02  **ICD-10 Diagnosis Code:** F10.11, F10.120, F10.20, F10.229, F10.10, F10.129, F10.21, F10.220, Z65.8 | +1 |

**Supplementary Materials Table S5. Comparison between Homer’s model and HAS-BLED Score vs. new ICH model: Reclassification of predicted 1-Year ICH risk categories in the training set**

| **HAS-BLED Score** | | | | | | |
| --- | --- | --- | --- | --- | --- | --- |
|  | **AF ICH Risk Model** | | | | |  |
| **HAS-BLED Score** | **0 - 0.4%** |  | **0.4% - 0.8%** |  | **0.8 % - 100%** | **Total Population** |
| **0 to < 0.4%** |  |  |  |  |  |  |
| Persons included, n (%) | 31,722 (43.0) |  | 37,861 (51.3) |  | 4,211 (5.7) | 73,794 (11.7) |
| Case patients, n (%) | 61 (21.2) |  | 184 (63.9) |  | 43 (14.9) | 288 (7.3) |
| Control patients, n (%) | 31,661(43.1) |  | 37,677 (51.3) |  | 4,168 (5.7) | 73,506 (11.7) |
| Observed risk, % | 0.216 |  | 0.551 |  | 1.224 | 0.442 |
| **0.4 % to < 0.8 %** |  |  |  |  |  |  |
| Persons included, n (%) | 74,449 (22.6) |  | 186,240 (56.6) |  | 68,167 (20.7) | 328,856 (52.2) |
| Case patients, n (%) | 186 (10.9) |  | 899 (52.7) |  | 622 (36.4) | 1,707 (43.1) |
| Control patients, n (%) | 74,263 (22.7) |  | 185,341 (56.7) |  | 67,545 (20.6) | 327,149 (52.3) |
| Observed risk, % | 0.280 |  | 0.550 |  | 1.100 | 0.596 |
| **≥ 0.8 %** |  |  |  |  |  |  |
| Persons included, n (%) | 13,811 (6.1) |  | 86,541 (38.1) |  | 126,802 (55.8) | 227,154 (36.1) |
| Case patients, n (%) | 33 (1.7) |  | 522 (26.5) |  | 1,413 (71.8) | 1,968 (49.7) |
| Control patients, n (%) | 13,778 (6.1) |  | 86,019 (38.2) |  | 125,389 (55.7) | 225,186 (36.0) |
| Observed risk, % | 0.271 |  | 0.707 |  | 1.398 | 1.051 |
| **Total Population** |  |  |  |  |  |  |
| Persons included, n (%) | 119,982 (19.1) |  | 310,642 (49.3) |  | 199,180 (31.6) | 629,804 |
| Case patients, n (%) | 280 (7.1) |  | 1605 (40.5) |  | 2,078 (52.4) | 3,963 |
| Control patients, n (%) | 119,702 (19.1) |  | 309,037 (49.4) |  | 197,102 (31.5) | 625,841 |
| Observed risk, % | 0.262 |  | 0.593 |  | 1.290 | 0.735 |
| NRI: 0.14 95% CI (0.12, 0.16), Event NRI: 0.03 95% CI (0.01, 0.05), Non-event NRI: 0.10 95% CI (0.10, 0.11) | | | | | |  |
| **Homer Score** | | | | | | |
|  | **AF ICH Risk Model** | | | | |  |
| **Homer’s Model** | **0 - 0.4%** |  | **0.4% - 0.8%** |  | **0.8 % - 100%** | **Total Population** |
| **0 to < 0.4%** |  |  |  |  |  |  |
| Persons included, n (%)* | 0 (-) |  | 0 (-) |  | 0 (-) |  |
| **0.4 % to < 0.8 %** |  |  |  |  |  |  |
| Persons included, n (%) | 119,190 (22.3) |  | 294,143 (54.9) |  | 122,202 (22.8) | 535,535 (85.0) |
| Case patients, n (%) | 276 (9.4) |  | 1,485 (50.3) |  | 1,189 (40.3) | 2,950 (74.4) |
| Control patients, n (%) | 118,914 (22.3) |  | 292,658 (55.0) |  | 121,013 (22.7) | 532,585 (85.1) |
| Observed risk, % | 0.260 |  | 0.579 |  | 1.183 | 0.637 |
| **≥ 0.8 %** |  |  |  |  |  |  |
| Persons included, n (%) | 792 (0.8) |  | 16,499 (17.5) |  | 76,978 (81.7) | 94,269 (15.0) |
| Case patients, n (%) | 4 (0.4) |  | 120 (11.8) |  | 889 (87.8) | 1,013 (25.6) |
| Control patients, n (%) | 788 (0.8) |  | 16,379 (17.6) |  | 76,089 (81.6) | 93,256 (14.9) |
| Observed risk, % | 0.553 |  | 0.843 |  | 1.466 | 1.339 |
| **Total Population** |  |  |  |  |  |  |
| Persons included, n (%) | 119,982 (19.1) |  | 310,642 (49.3) |  | 199,180 (31.6) | 629,804 |
| Case patients, n (%) | 280 (7.1) |  | 1605 (40.5) |  | 2,078 (52.4) | 3,963 |
| Control patients, n (%) | 119,702 (19.1) |  | 309,037 (49.4) |  | 197,102 (31.5) | 625,841 |
| Observed risk, % | 0.262 |  | 0.593 |  | 1.290 | 0.735 |
| NRI: 0.24 95% CI (0.22, 0.26), Event NRI: 0.21 95% CI (0.19, 0.23), Non-event NRI: 0.02 95% CI (0.02, 0.03) | | | | | |  |

Red shading denotes an increase in risk category. Blue shading denotes a decrease in risk category.

Abbreviations: AF, atrial fibrillation; ICH, intracranial hemorrhage; NRI, net reclassification index
* No patients were classified to the low risk group by Homer’s model.

**Supplementary Materials Table S6. Prediction model for the risk of one-year risk of censoring status due to death, disenrollment, or end of data (IPCW Model)**

| **Predictor** | **Hazard Ratio  (95% CI)** | **Coefficient** | **Standard Error** |
| --- | --- | --- | --- |
| Age: 75-84 | 1.00 (1.00, 1.01) | 0.002 | 0.003 |
| Age: >84 | 1.00 (1.00, 1.01) | 0.004 | 0.005 |
| Gender: Female | 1.00 (0.99, 1.01) | 0.000 | 0.004 |
| Race: Black | 1.00 (0.98, 1.01) | -0.003 | 0.007 |
| Race: Asian | 1.01 (0.98, 1.03) | 0.006 | 0.012 |
| Race: Hispanic | 1.00 (0.98, 1.03) | 0.003 | 0.013 |
| Race: Other/Unknown | 1.00 (0.98, 1.02) | 0.003 | 0.010 |
| Other supplies including diabetes supplies and contraceptives | 1.00 (0.99, 1.01) | 0.000 | 0.005 |
| Diabetic footwear | 1.00 (0.99, 1.02) | 0.004 | 0.009 |
| Walking aids and attachments | 1.00 (0.99, 1.01) | 0.000 | 0.007 |
| Hospital beds and associated supplies | 1.00 (0.98, 1.03) | 0.004 | 0.013 |
| Accessories for oxygen delivery devices | 1.00 (0.98, 1.01) | -0.004 | 0.006 |
| Drugs, administered by injection | 1.00 (0.99, 1.01) | 0.001 | 0.003 |
| Inhalation solutions | 1.00 (0.98, 1.01) | -0.002 | 0.007 |
| Wheelchairs, components, and accessories | 1.00 (0.98, 1.02) | -0.002 | 0.010 |
| Vaccine administration | 1.00 (0.99, 1.01) | 0.000 | 0.003 |
| Screening examinations and disease management training | 1.00 (0.99, 1.01) | 0.001 | 0.004 |
| Preventive medicine services | 1.00 (0.98, 1.02) | -0.002 | 0.009 |
| Anesthesia – head | 1.00 (0.99, 1.01) | 0.001 | 0.006 |
| Anesthesia – intrathoracic | 1.00 (0.98, 1.01) | -0.002 | 0.007 |
| Anesthesia – knee and popliteal area | 1.00 (0.98, 1.02) | -0.001 | 0.010 |
| Surgery – respiratory system | 1.00 (0.99, 1.01) | 0.000 | 0.006 |
| Surgery – nervous system | 1.00 (0.99, 1.01) | 0.000 | 0.005 |
| Therapeutic drug assays | 1.00 (0.99, 1.01) | -0.002 | 0.006 |
| Cytopathology | 1.00 (0.99, 1.01) | 0.000 | 0.006 |
| Surgical pathology | 1.00 (0.99, 1.01) | 0.001 | 0.003 |
| Medicine – Ophthalmology | 1.00 (0.99, 1.01) | 0.001 | 0.005 |
| Medicine – Cardiovascular | 1.00 (0.99, 1.01) | -0.001 | 0.006 |
| Medicine – Noninvasive vascular diagnostic studies | 1.00 (0.99, 1.01) | 0.001 | 0.004 |
| Physical medicine and rehabilitation | 1.00 (0.99, 1.01) | -0.001 | 0.004 |
| Transportation services including ambulance | 1.00 (0.99, 1.01) | 0.001 | 0.004 |
| Diseases of male genital organs | 1.00 (0.99, 1.01) | 0.000 | 0.005 |
| Infections of skin and subcutaneous tissue | 1.00 (0.99, 1.01) | 0.000 | 0.005 |
| Other inflammatory conditions of skin and subcutaneous tissue | 1.00 (0.99, 1.01) | -0.001 | 0.004 |
| Congenital anomalies in urinary system | 1.00 (0.98, 1.03) | 0.002 | 0.013 |
| Nonspecific abnormal findings | 1.00 (0.99, 1.01) | -0.002 | 0.003 |
| Contusion with intact skin surface | 1.00 (0.99, 1.01) | 0.002 | 0.006 |
| Other and unspecified effects of external causes | 1.00 (0.99, 1.01) | 0.000 | 0.006 |
| Persons with a condition influencing their health status | 1.00 (0.99, 1.01) | 0.000 | 0.003 |
| Other psychoses | 1.00 (0.99, 1.02) | 0.003 | 0.006 |
| Neurotic Disorders, Personality Disorders, And Other Nonpsychotic Mental Disorders | 1.00 (0.99, 1.01) | 0.002 | 0.004 |
| Hereditary and degenerative diseases of the central nervous system | 1.00 (0.99, 1.01) | 0.001 | 0.005 |
| Other disorders of the central nervous system | 1.00 (0.99, 1.02) | 0.004 | 0.006 |
| Disorders of the peripheral nervous system | 1.00 (0.99, 1.01) | -0.002 | 0.005 |
| Disorders of the eye and adnexa | 1.00 (0.99, 1.01) | 0.000 | 0.005 |
| Hypertensive disease | 1.00 (0.99, 1.01) | 0.001 | 0.004 |
| Ischemic heart disease | 1.00 (0.99, 1.01) | 0.000 | 0.003 |
| Cerebrovascular disease | 1.00 (1.00, 1.01) | 0.004 | 0.004 |
| Diseases of arteries, arterioles, and capillaries | 1.00 (0.99, 1.01) | 0.000 | 0.004 |
| Diseases of esophagus, stomach, and duodenum | 1.00 (0.99, 1.01) | -0.001 | 0.004 |
| Nephritis, nephrotic syndrome, and nephrosis | 1.00 (0.99, 1.01) | 0.001 | 0.004 |
| Other bacterial diseases | 1.00 (0.99, 1.01) | -0.003 | 0.006 |
| Malignant neoplasm of other and unspecified sites | 1.00 (0.99, 1.01) | 0.000 | 0.006 |
| Disorders of thyroid gland | 1.00 (0.99, 1.01) | 0.001 | 0.003 |
| Diseases of other endocrine glands | 1.00 (0.99, 1.01) | 0.000 | 0.004 |
| Other metabolic and immunity disorders | 1.00 (0.99, 1.01) | 0.000 | 0.004 |
| Other and unspecified anemias | 1.00 (0.99, 1.01) | 0.000 | 0.004 |
| Purpura and other hemorrhagic conditions | 1.00 (0.99, 1.02) | 0.002 | 0.007 |
| Diseases of white blood cells | 1.00 (0.99, 1.01) | 0.001 | 0.007 |
| Organic psychotic conditions | 1.00 (0.99, 1.01) | -0.001 | 0.006 |

IPCW predictor definitions are detailed in: Kim DH, Schneeweiss S, Glynn RJ, Lipsitz LA, Rockwood K, Avorn J. Measuring Frailty in Medicare Data: Development and Validation of a Claims-Based Frailty Index. *The Journals of Gerontology: Series A*. 2017;73(7):980-987. doi:10.1093/gerona/glx229

**Supplementary Materials Table S7. Prediction model for the risk of one-year risk of intracranial bleeding outcome in IPCW weighted pseudo-population (AF ICH IPCW Model)**

| **Predictor** | **Hazard Ratio (95% CI)** | **Coefficient** | **Robust Standard Error** |
| --- | --- | --- | --- |
| Age: 75-84 | 1.48 (1.37, 1.60) | 0.394 | 0.040 |
| Age: >84 | 1.94 (1.77, 2.13) | 0.663 | 0.048 |
| Gender: Female | 0.91 (0.85, 0.97) | -0.094 | 0.034 |
| Race: Black | 1.01 (0.88, 1.16) | 0.010 | 0.071 |
| Race: Asian | 1.59 (1.31, 1.92) | 0.462 | 0.097 |
| Race: Hispanic | 1.16 (0.93, 1.44) | 0.148 | 0.111 |
| Race: Other/Unknown | 1.21 (0.99, 1.49) | 0.194 | 0.104 |
| Number of Hospitalizations | 1.04 (1.01, 1.08) | 0.044 | 0.016 |
| Number of Office visits | 1.01 (1.00, 1.01) | 0.006 | 0.002 |
| Hospitalization in past 30 days | 1.15 (1.07, 1.23) | 0.137 | 0.037 |
| Number of Skilled nursing facility stays | 0.95 (0.92, 0.98) | -0.050 | 0.017 |
| Number of ED visits | 1.03 (1.02, 1.05) | 0.032 | 0.007 |
| Diabetic footwear | 1.09 (0.92, 1.28) | 0.083 | 0.085 |
| Walking aids and attachments | 1.09 (0.97, 1.24) | 0.090 | 0.063 |
| Wheelchairs, components, and accessories | 1.21 (1.05, 1.40) | 0.194 | 0.073 |
| Inhalation solutions | 0.90 (0.77, 1.04) | -0.108 | 0.076 |
| Anesthesia, intrathoracic | 0.85 (0.73, 0.98) | -0.168 | 0.076 |
| Anesthesia, knee and popliteal | 0.63 (0.48, 0.81) | -0.466 | 0.132 |
| Home oxygen use | 0.88 (0.74, 1.06) | -0.123 | 0.092 |
| Congestive heart failure | 1.09 (1.02, 1.18) | 0.090 | 0.037 |
| Hypertension | 1.15 (1.05, 1.25) | 0.137 | 0.046 |
| Ischemic heart disease | 1.04 (0.97, 1.11) | 0.037 | 0.036 |
| Stroke | 1.38 (1.28, 1.49) | 0.325 | 0.039 |
| Transient ischemic attack | 1.12 (1.00, 1.25) | 0.111 | 0.056 |
| Alcohol use disorder | 1.28 (1.03, 1.59) | 0.246 | 0.111 |
| Anemia | 1.11 (1.03, 1.19) | 0.104 | 0.037 |
| Dementia | 1.27 (1.13, 1.41) | 0.235 | 0.057 |
| Diabetes | 1.04 (0.97, 1.13) | 0.043 | 0.039 |
| Hip/Pelvic fracture | 1.14 (0.97, 1.33) | 0.130 | 0.080 |
| GI Bleed | 1.05 (0.95, 1.17) | 0.050 | 0.053 |
| Acute renal failure | 1.15 (1.05, 1.27) | 0.144 | 0.050 |
| CKD 3-4 | 1.06 (0.97, 1.16) | 0.058 | 0.044 |
| Obesity | 0.83 (0.75, 0.91) | -0.192 | 0.050 |
| Syncope | 1.12 (1.02, 1.23) | 0.115 | 0.046 |
| Prior intracranial hemorrhage | 1.89 (1.60, 2.24) | 0.638 | 0.086 |
| Anticoagulants, injectable | 0.82 (0.63, 1.06) | -0.200 | 0.131 |
| Antiplatelet | 1.06 (0.97, 1.15) | 0.055 | 0.044 |
| Calcium channel blockers | 1.29 (1.09, 1.52) | 0.252 | 0.086 |
| SSRI/SNRI | 1.34 (1.24, 1.44) | 0.291 | 0.039 |
| Bronchodilators | 0.91 (0.84, 1.00) | -0.092 | 0.045 |
| Dementia medications | 1.20 (1.06, 1.37) | 0.185 | 0.065 |
| Insulin | 1.09 (0.97, 1.23) | 0.084 | 0.061 |
| Sulfonylurea | 1.14 (1.02, 1.27) | 0.132 | 0.055 |
| Proton pump inhibitors | 0.91 (0.84, 0.97) | -0.099 | 0.036 |
| NSAIDs | 0.86 (0.79, 0.94) | -0.149 | 0.045 |

**Supplementary Materials Table S8.** AF ICH risk model, HAS-BLED score, Homer fall risk model, and sensitivity analysis AF ICH model trained without Warfarin users: AUC in predicting 1-year risk of ICH, IPH, and SDH in populations including and excluding Warfarin users

|  | **Original AF ICH Model Trained and Evaluated Including Warfarin Users**  **(i.e. Originally Reported)** | | **Original AF ICH Model Trained Including Warfarin Users and Evaluated Excluding Warfarin Users** | | **Sensitivity Analysis AF ICH Model Trained and Evaluated Excluding Warfarin Users** | |
| --- | --- | --- | --- | --- | --- | --- |
|  | **Training** | **Validation** | **Training** | **Validation** | **Training** | **Validation** |
| **AUC ICH** | 0.653 | 0.647 | 0.651 | 0.653 | 0.658 | 0.642 |
| **AUC IPH** | 0.631 | 0.625 | 0.627 | 0.648 | 0.635 | 0.642 |
| **AUC SDH** | 0.665 | 0.664 | 0.670 | 0.674 | 0.677 | 0.652 |
|  | **HAS-BLED Score Evaluated Including Warfarin Users**  **(i.e. Originally Reported)** | | **HAS-BLED Score Evaluated Including Warfarin Users**  **(i.e. Originally Reported)** | |  |  |
|  | **Training** | **Validation** | **Training** | **Validation** |  |  |
| **AUC ICH** | 0.580 | 0.567 | 0.577 | 0.557 |  |  |
| **AUC IPH** | 0.586 | 0.579 | 0.583 | 0.597 |  |  |
| **AUC SDH** | 0.583 | 0.568 | 0.577 | 0.535 |  |  |
|  | **Homer Score Evaluated Including Warfarin Users**  **(i.e. Originally Reported)** | | **Homer Score Evaluated Excluding Warfarin Users** | |  |  |
|  | **Training** | **Validation** | **Training** | **Validation** |  |  |
| **AUC ICH** | 0.624 | 0.623 | 0.628 | 0.628 |  |  |
| **AUC IPH** | 0.598 | 0.591 | 0.595 | 0.594 |  |  |
| **AUC SDH** | 0.635 | 0.640 | 0.650 | 0.658 |  |  |

**Supplementary Materials Table S9. Comparison of Original Model and Sensitivity Analysis repeating modeling procedures in a cohort excluding Warfarin Users**

| **Original Model** | | | | **Sensitivity Analysis AF ICH Model Trained and Validated in DOAC users only (i.e. excluding Warfarin Users)** | | | |
| --- | --- | --- | --- | --- | --- | --- | --- |
| **Predictor** | **Hazard Ratio (95% CI)** | **Coefficient** | **Standard Error** | **Predictor** | **Hazard Ratio (95% CI)** | **Coefficient** | **Standard Error** |
| **Demographic Variables** | | | | | | | |
| Age: 75-84 | 1.48 (1.37, 1.60) | 0.394 | 0.04 | Age: 75-84 | 1.56 (1.40, 1.74) | 0.443 | 0.055 |
| Age: >84 | 1.94 (1.77, 2.12) | 0.662 | 0.047 | Age: >84 | 2.08 (1.84, 2.37) | 0.734 | 0.065 |
| Gender: Female | 0.91 (0.85, 0.97) | -0.094 | 0.034 | Gender: Female | 0.86 (0.79, 0.94) | -0.148 | 0.047 |
| Race: Black | 1.01 (0.88, 1.16) | 0.009 | 0.07 | Race: Black | 0.95 (0.77, 1.17) | -0.049 | 0.106 |
| Race: Asian | 1.59 (1.31, 1.92) | 0.462 | 0.097 | Race: Asian | 1.36 (1.03, 1.80) | 0.309 | 0.142 |
| Race: Hispanic | 1.16 (0.93, 1.44) | 0.148 | 0.111 | Race: Hispanic | 1.09 (0.80, 1.49) | 0.088 | 0.157 |
| Race: Other/Unknown | 1.21 (0.99, 1.49) | 0.194 | 0.104 | Race: Other/Unknown | 1.04 (0.77, 1.41) | 0.043 | 0.153 |
| **Healthcare Resource Utilization Variables** | | | | | | | |
| Number of Hospitalizations* | 1.05 (1.01, 1.08) | 0.044 | 0.016 | Number of Hospitalizations | 1.02 (0.98, 1.07) | 0.025 | 0.023 |
| Number of Office visits* | 1.01 (1.00, 1.01) | 0.006 | 0.002 |  |  |  |  |
| Hospitalization in past 30 days | 1.15 (1.07, 1.23) | 0.137 | 0.037 | Hospitalization in past 30 days | 1.08 (0.98, 1.20) | 0.079 | 0.052 |
| Number of Skilled nursing facility stays | 0.95 (0.92, 0.98) | -0.05 | 0.017 |  |  |  |  |
| Number of ED visits* | 1.03 (1.02, 1.05) | 0.032 | 0.007 | Number of ED visits* | 1.04 (1.02, 1.06) | 0.039 | 0.008 |
| Frailty-Related Predictors |  |  |  |  |  |  |  |
| Diabetic footwear | 1.09 (0.92, 1.28) | 0.082 | 0.084 |  |  |  |  |
| Walking aids and attachments | 1.09 (0.97, 1.24) | 0.091 | 0.062 |  |  |  |  |
| Wheelchairs, components, and accessories | 1.21 (1.05, 1.40) | 0.194 | 0.073 | Wheelchairs, components, and accessories | 1.25 (1.01, 1.53) | 0.220 | 0.106 |
| Inhalation solutions | 0.90 (0.78, 1.04) | -0.108 | 0.075 | Anesthesia, head | 0.86 (0.70, 1.05) | -0.215 | 0.114 |
| Anesthesia, intrathoracic | 0.85 (0.73, 0.98) | -0.168 | 0.076 | Anesthesia, intrathoracic | 0.81 (0.64, 1.01) | -0.482 | 0.195 |
| Anesthesia, knee and popliteal | 0.63 (0.49, 0.81) | -0.466 | 0.131 |  |  |  |  |
| Home oxygen use | 0.88 (0.74, 1.06) | -0.123 | 0.09 |  |  |  |  |
|  |  |  |  | Anesthesia, knee and popliteal | 0.62 (0.42, 0.91) | -0.154 | 0.101 |
|  |  |  |  | Accessories for oxygen delivery devices | 0.89 (0.74, 1.07) | -0.113 | 0.094 |
| **Comorbidities** | | | | | | | |
| Congestive heart failure | 1.09 (1.02, 1.17) | 0.09 | 0.036 |  |  |  |  |
| Hypertension | 1.15 (1.05, 1.26) | 0.138 | 0.046 | Hypertension | 1.30 (1.14, 1.47) | 0.259 | 0.063 |
| Ischemic heart disease | 1.04 (0.97, 1.11) | 0.037 | 0.035 |  |  |  |  |
| Stroke | 1.38 (1.28, 1.49) | 0.325 | 0.039 | Stroke | 1.47 (1.33, 1.64) | 0.388 | 0.054 |
| Transient ischemic attack | 1.12 (1.00, 1.25) | 0.11 | 0.056 | Transient ischemic attack | 1.11 (0.95, 1.29) | 0.102 | 0.078 |
| Alcohol use disorder | 1.28 (1.03, 1.59) | 0.246 | 0.111 | Alcohol use disorder | 1.38 (1.04, 1.83) | 0.321 | 0.146 |
| Anemia | 1.11 (1.03, 1.19) | 0.104 | 0.037 | Anemia | 1.09 (0.99, 1.20) | 0.086 | 0.051 |
| Dementia | 1.26 (1.14, 1.41) | 0.235 | 0.054 | Dementia | 1.28 (1.10, 1.49) | 0.247 | 0.078 |
| Diabetes | 1.04 (0.97, 1.13) | 0.043 | 0.039 |  |  |  |  |
| Hip/Pelvic fracture | 1.14 (0.97, 1.33) | 0.129 | 0.08 | Hip/Pelvic fracture | 1.17 (0.94, 1.47) | 0.159 | 0.115 |
| GI Bleed | 1.05 (0.95, 1.17) | 0.05 | 0.053 |  |  |  |  |
| Acute renal failure | 1.15 (1.05, 1.27) | 0.143 | 0.048 | Acute renal failure | 1.22 (1.08, 1.39) | 0.202 | 0.066 |
| CKD 3-4 | 1.06 (0.97, 1.15) | 0.058 | 0.043 |  |  |  |  |
| Obesity | 0.82 (0.75, 0.91) | -0.193 | 0.05 | Obesity | 0.86 (0.75, 0.99) | -0.145 | 0.070 |
| Syncope | 1.12 (1.02, 1.23) | 0.115 | 0.046 | Syncope | 1.11 (0.98, 1.26) | 0.105 | 0.064 |
| Prior intracranial hemorrhage | 1.89 (1.60, 2.24) | 0.637 | 0.085 | Prior intracranial hemorrhage | 1.70 (1.32, 2.18) | 0.529 | 0.127 |
|  |  |  |  | Coronary Revascularization | 1.19 (0.85, 1.66) | 0.172 | 0.172 |
|  |  |  |  | Prior fall | 1.58 (1.16, 2.14) | 0.457 | 0.156 |
| **Dispensed Prescription Medications** | | | | | | | |
| Anticoagulants, injectable | 0.82 (0.63, 1.06) | -0.201 | 0.13 |  |  |  |  |
| Antiplatelet | 1.06 (0.97, 1.15) | 0.055 | 0.043 | Antiplatelet | 1.11 (0.99, 1.25) | 0.104 | 0.059 |
| Calcium channel blockers | 1.29 (1.09, 1.52) | 0.252 | 0.086 | Calcium channel blockers | 1.35 (1.06, 1.71) | 0.297 | 0.122 |
| SSRI/SNRI | 1.34 (1.24, 1.44) | 0.291 | 0.038 | SSRI/SNRI | 1.29 (1.16, 1.43) | 0.253 | 0.054 |
| Bronchodilators | 0.91 (0.84, 1.00) | -0.092 | 0.045 | Bronchodilators | 0.94 (0.84, 1.06) | -0.061 | 0.061 |
| Dementia medications | 1.20 (1.06, 1.36) | 0.184 | 0.064 | Dementia medications | 1.28 (1.08, 1.52) | 0.245 | 0.088 |
| Insulin | 1.09 (0.97, 1.22) | 0.084 | 0.06 |  |  |  |  |
| Sulfonylurea | 1.14 (1.02, 1.27) | 0.131 | 0.055 | Sulfonylurea | 1.21 (1.04, 1.40) | 0.188 | 0.076 |
| Proton pump inhibitors | 0.91 (0.85, 0.97) | -0.099 | 0.036 | Proton pump inhibitors | 0.89 (0.81, 0.99) | -0.112 | 0.050 |
| NSAIDs | 0.86 (0.79, 0.94) | -0.149 | 0.045 | NSAIDs | 0.89 (0.79, 1.00) | -0.120 | 0.061 |
|  |  |  |  | Metformin | 1.11 (0.98, 1.27) | 0.108 | 0.066 |
|  |  |  |  | ACE inhibitors | 1.11 (1.00, 1.22) | 0.101 | 0.051 |
|  |  |  |  | Statins | 0.90 (0.82, 0.99) | -0.106 | 0.047 |
|  |  |  |  | Tricyclic antidepressants | 1.19 (0.94, 1.51) | 0.174 | 0.121 |
|  |  |  |  | Other Antidepressants | 1.10 (0.95, 1.28) | 0.099 | 0.076 |
|  |  |  |  | Antipsychotic Agents | 1.21 (0.99, 1.47) | 0.188 | 0.102 |
|  |  |  |  | Anxiolytics (except benzodiazepines) | 0.66 (0.42, 1.04) | -0.411 | 0.232 |
| * In the baseline period (i.e., 365 days before cohort entry) | | | | | | | |

**Supplementary Materials Figure S1.** Study Design Diagram

**
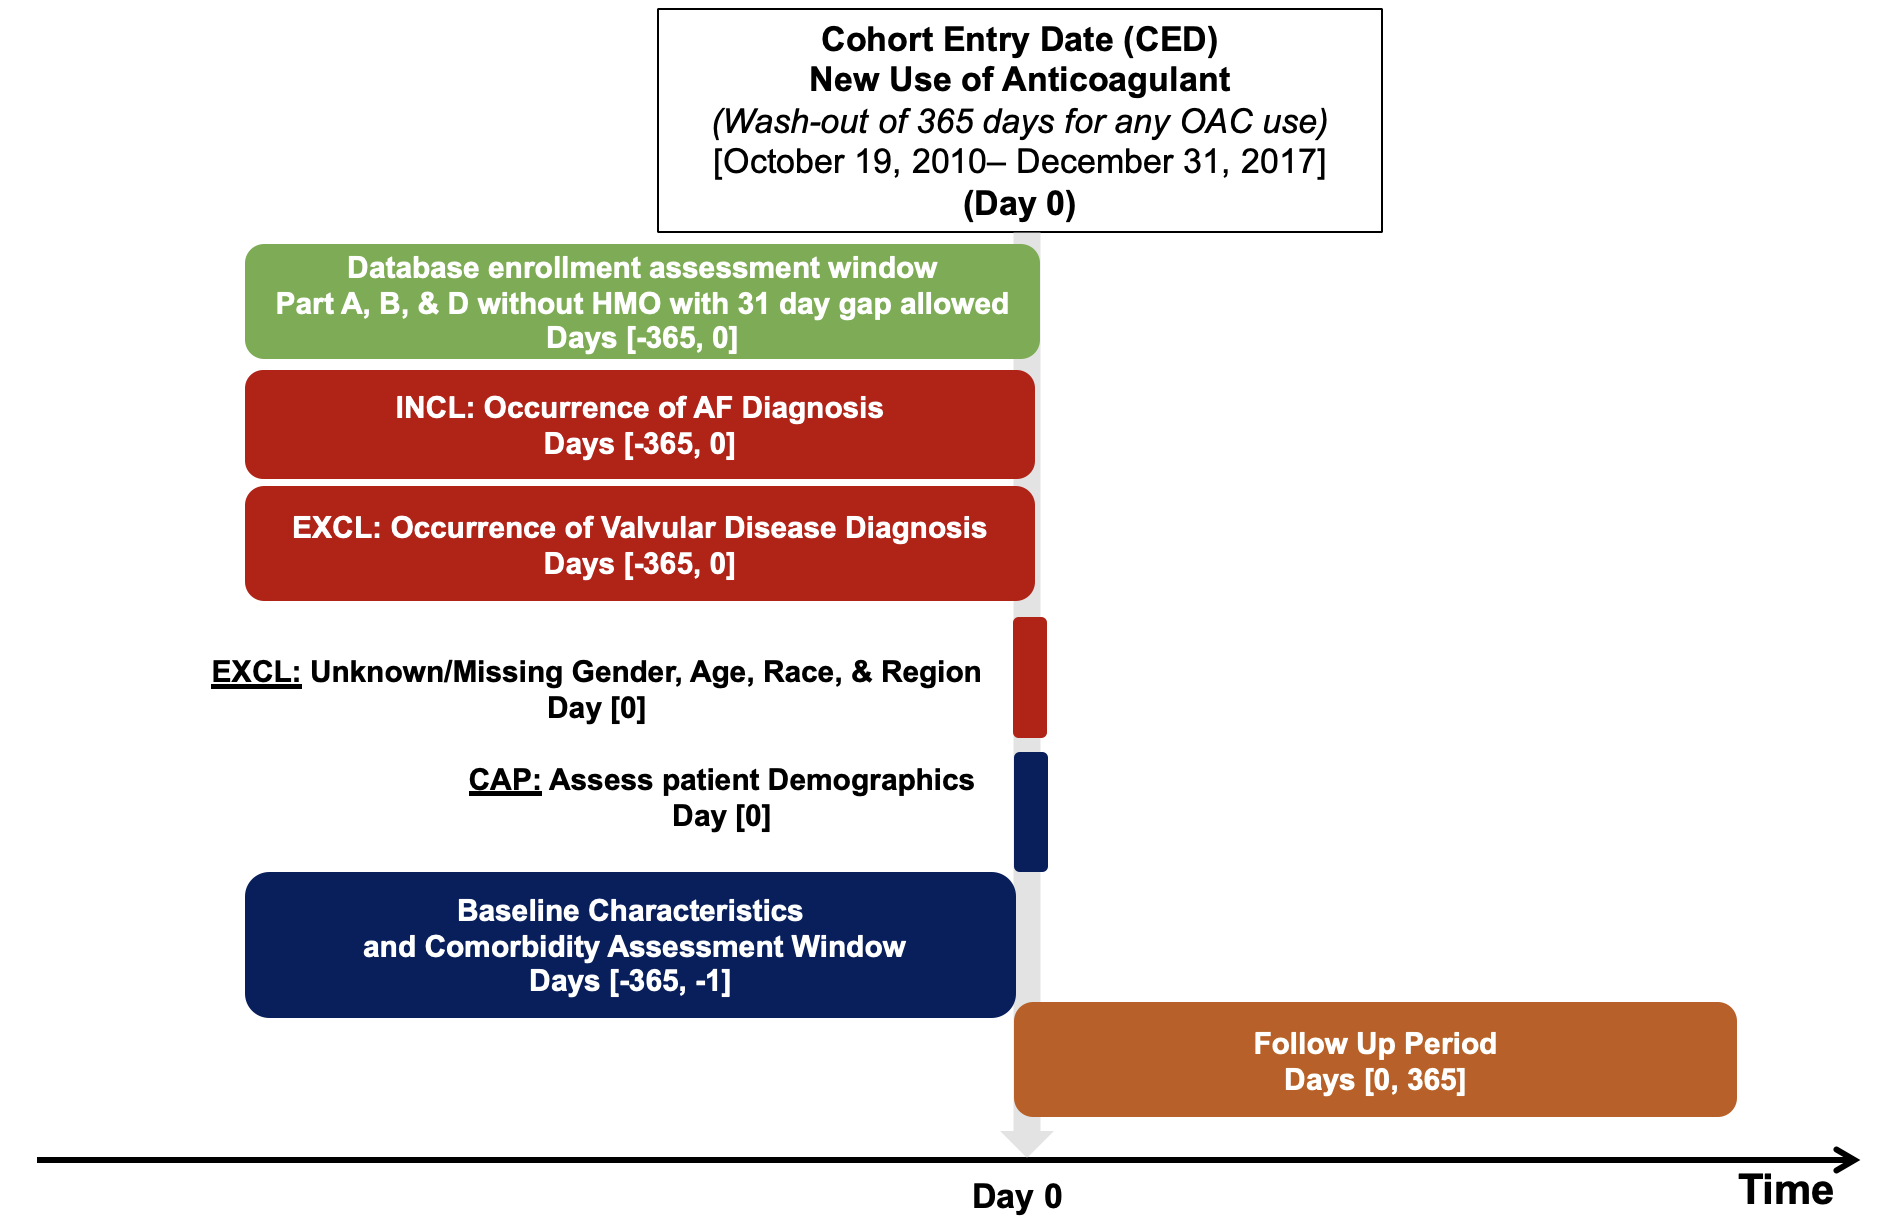
**

**Supplementary Materials Figure S2**. Observed vs. predicted ICH events based on AF ICH risk model with interaction terms

Abbreviations: ICH, intracranial hemorrhage; AF, atrial fibrillation

Chi-squared values based on the Hosmer-Lemeshow test were 177.1 (p<0.01) in the training set and 52.3 (p<0.01) in the validation set.

**Supplementary Materials Figure S3**. Comparison of AF ICH risk model with interaction terms vs. HAS-BLED score and vs. Homer fall risk model: AUC in predicting 1-year risk of ICH

| **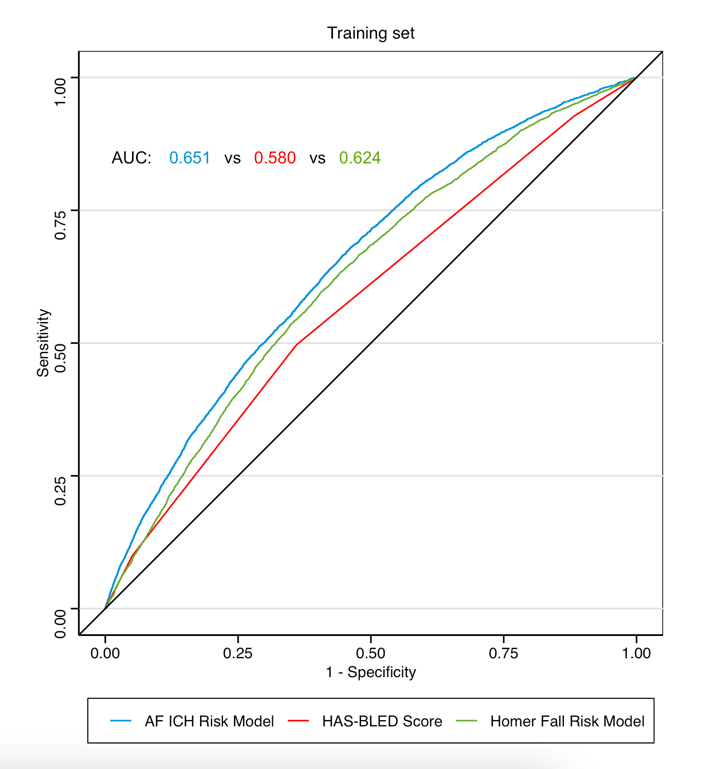** | **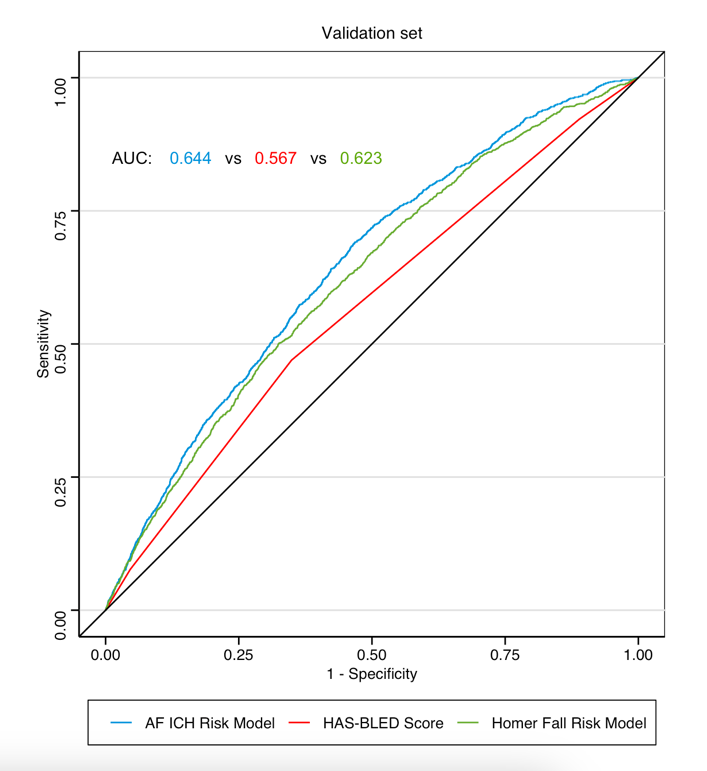** |
| --- | --- |

Abbreviations: AF, atrial fibrillation; ICH, intracranial hemorrhage; AUC, area under receiver operating characteristic curve

**Supplementary Materials Figure S4**. Observed vs. predicted ICH events based on AF ICH risk model weighted by IPCW

Abbreviations: ICH, intracranial hemorrhage; AF, atrial fibrillation; IPCW, inverse probability censoring weighting

Chi-squared values based on the Hosmer-Lemeshow test were 2651.4 (p<0.01) in the training set and 648.8 (p<0.01) in the validation set.

**Supplementary Materials Figure S5**. Comparison of AF ICH risk model weighted by IPCW vs. HAS-BLED score and vs. Homer fall risk model: AUC in predicting 1-year risk of ICH

| **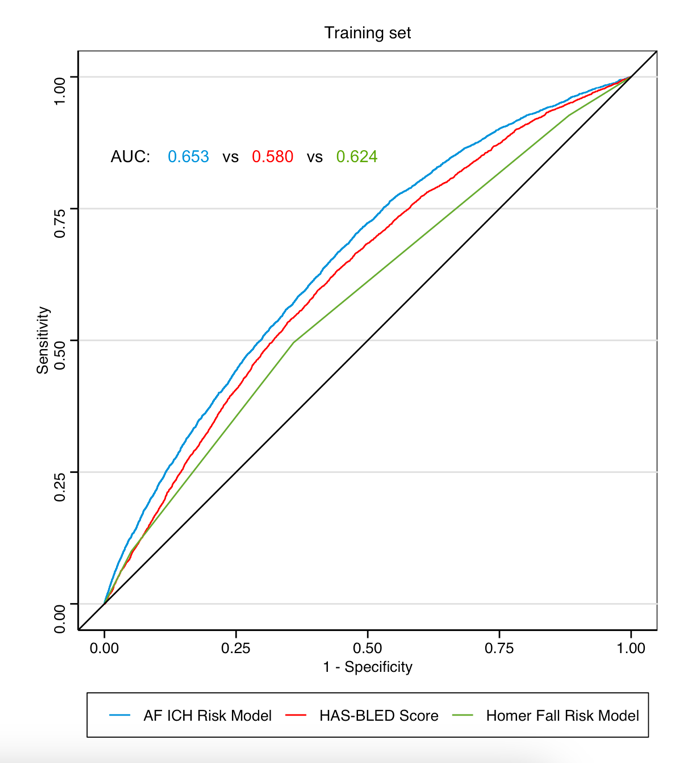** | **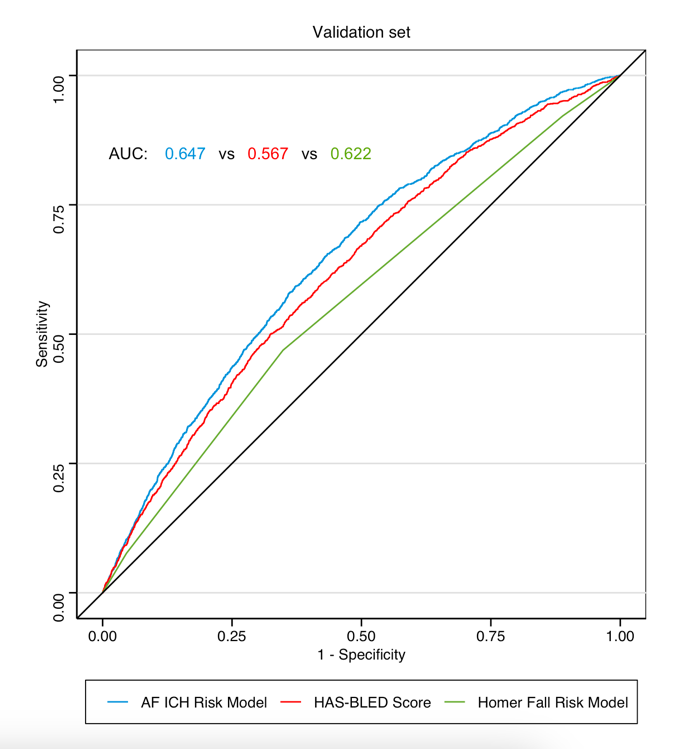** |
| --- | --- |

Abbreviations: AF, atrial fibrillation; ICH, intracranial hemorrhage; IPCW, inverse probability censoring weighting, AUC, area under receiver operating characteristic curve

**Supplementary Materials Figure S6**. Observed vs. predicted IPH events based on AF ICH risk model

Abbreviations: IPH, intraparenchymal hemorrhage, ICH, intracranial hemorrhage; AF, atrial fibrillation

Chi-squared values based on the Hosmer-Lemeshow test were 2516.5 (p<0.01) in the training set and 850.8 (p<0.01) in the validation set.

**Supplementary Materials Figure S7**. Comparison of AF ICH risk model vs. HAS-BLED score and vs. Homer fall risk model: AUC in predicting 1-year risk of IPH

| 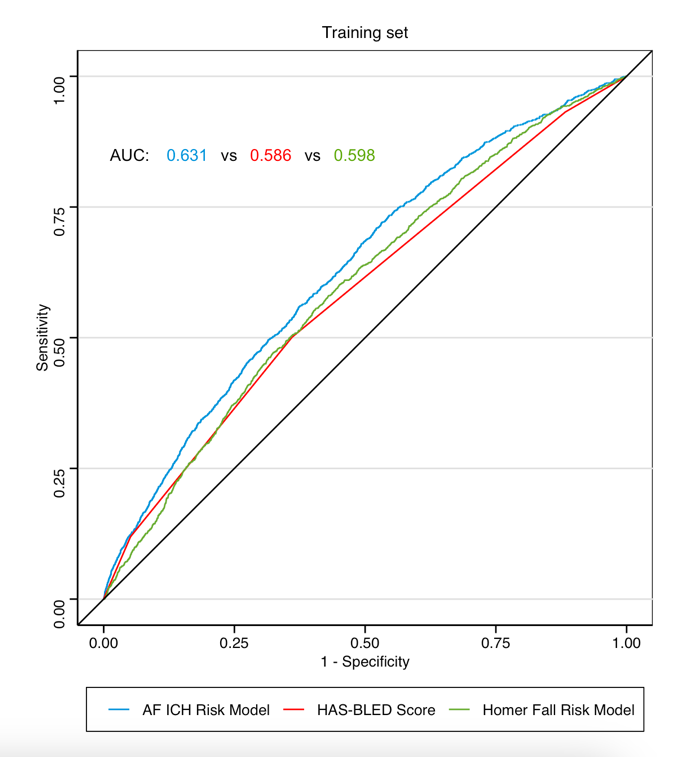 | 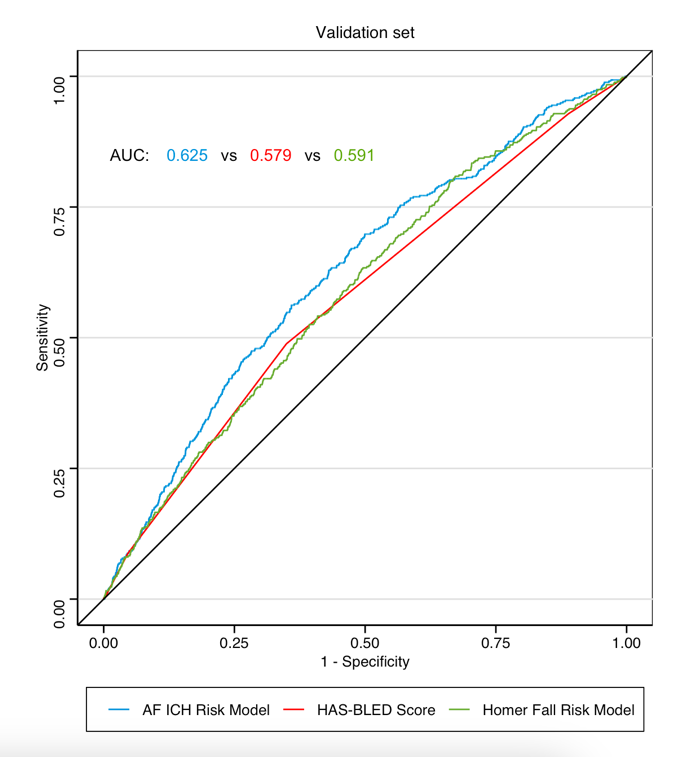 |
| --- | --- |

Abbreviations: AF, atrial fibrillation; ICH, intracranial hemorrhage; AUC, area under receiver operating characteristic curve; IPH, intraparenchymal hemorrhage

**Supplementary Materials Figure S8**. Observed vs. predicted SDH events based on AF ICH risk model

Abbreviations: SDH, subdural hemorrhage, ICH, intracranial hemorrhage; AF, atrial fibrillation

Chi-squared values based on the Hosmer-Lemeshow test were 2082.4 (p<0.01) in the training set and 619.5 (p<0.01) in the validation set.

**Supplementary Materials Figure S9**. Comparison of AF ICH risk model vs. HAS-BLED score and vs. Homer fall risk model: AUC in predicting 1-year risk of SDH

| 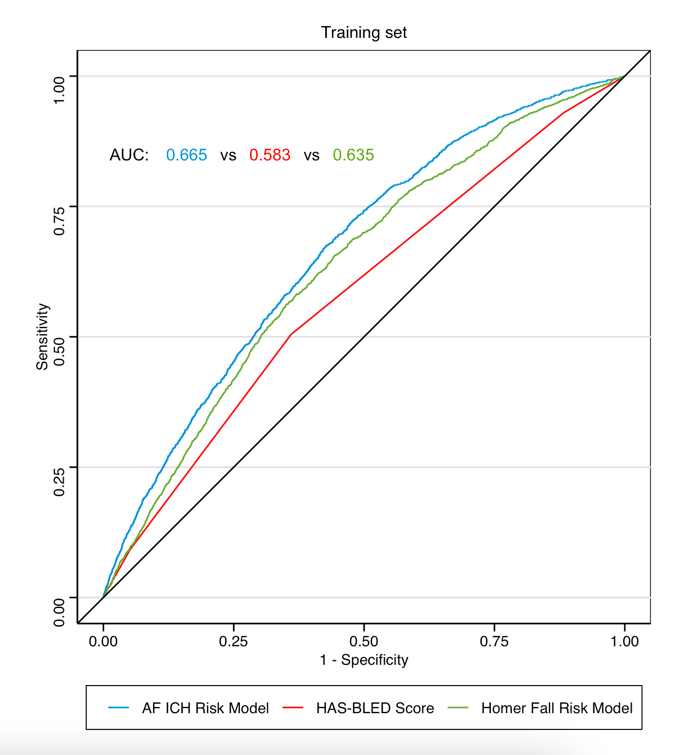 | 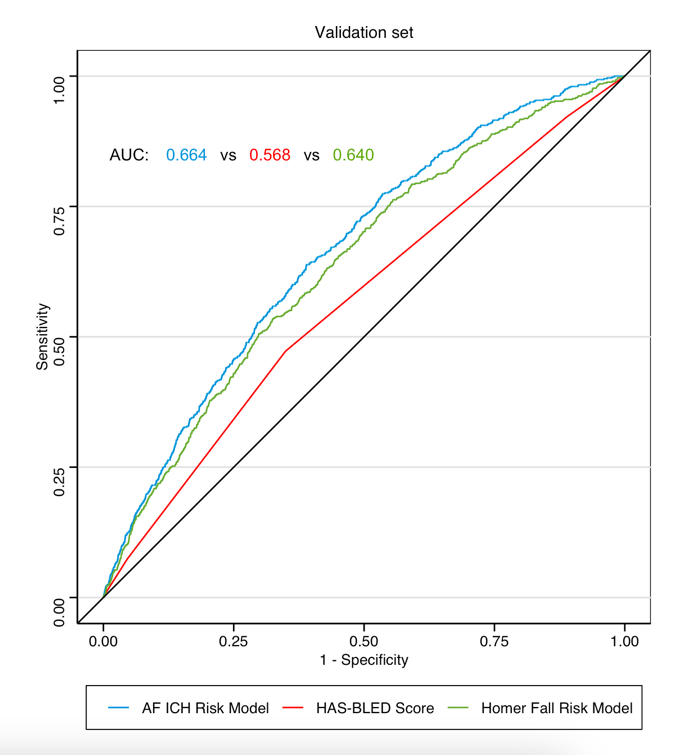 |
| --- | --- |

Abbreviations: AF, atrial fibrillation; ICH, intracranial hemorrhage; AUC, area under receiver operating characteristic curve; SDH, subdural hemorrhage

**Supplementary Materials Figure S10**. Observed vs. predicted ICH events based on AF ICH risk model in population excluding Warfarin users

Abbreviations: ICH, intracranial hemorrhage; AF, atrial fibrillation

Chi-squared values based on the Hosmer-Lemeshow test were 321.89 (p<0.01) in the training set and 98.21 (p<0.01) in the validation set.

**Supplementary Materials Figure S11**. Comparison of AF ICH risk model vs. HAS-BLED score and vs. Homer fall risk model in population excluding Warfarin users: AUC in predicting 1-year risk of ICH

| 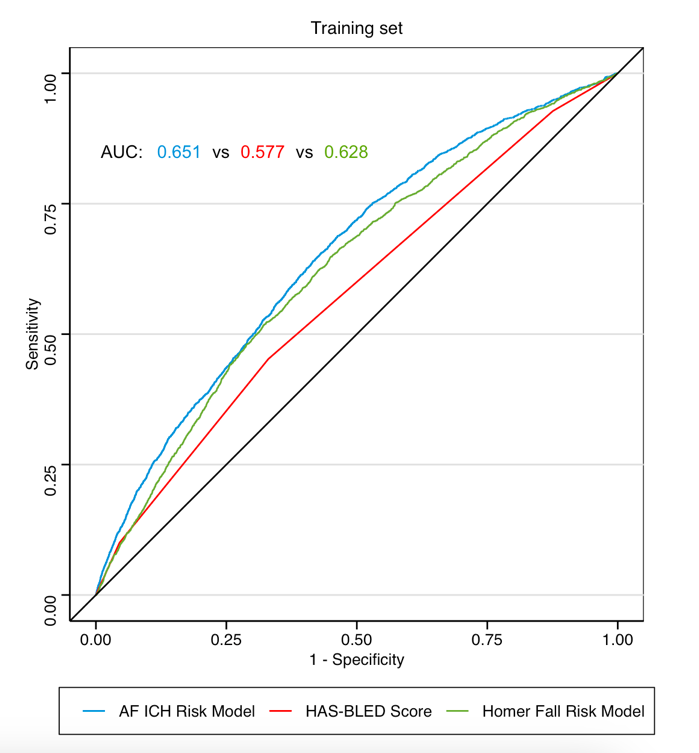 | 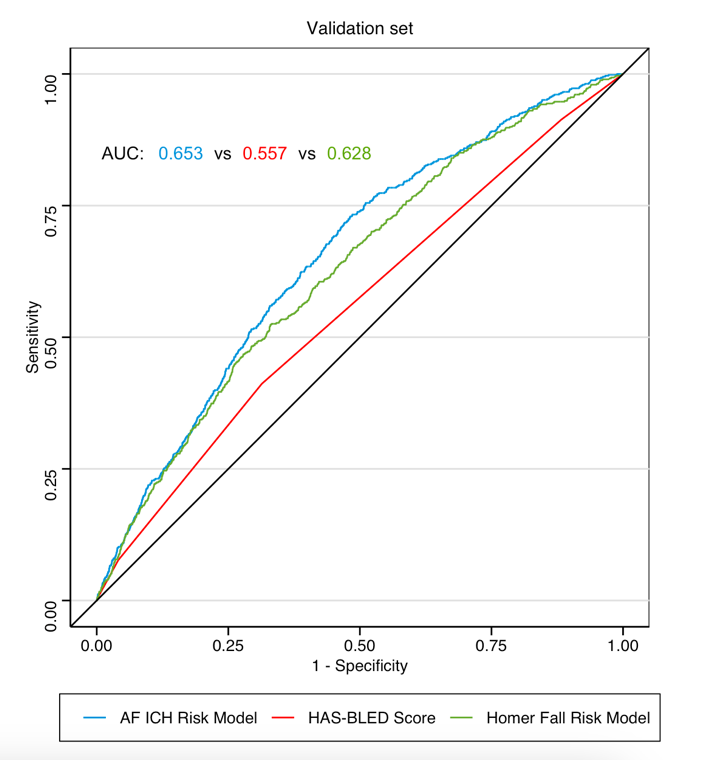 |
| --- | --- |

Abbreviations: AF, atrial fibrillation; ICH, intracranial hemorrhage; AUC, area under receiver operating characteristic curve

**
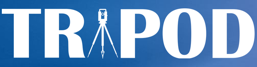
Supplementary Materials TRIPOD Checklist**: Transparent reporting of a multivariable prediction model for individual prognosis or diagnosis (TRIPOD) checklist for Prediction Model Development and Validation

| **Section/Topic** | **Item** |  | **Checklist Item** | **Page # of Original Manuscript** |
| --- | --- | --- | --- | --- |
| **Title and abstract** | | | | |
| Title | 1 | D;V | Identify the study as developing and/or validating a multivariable prediction model, the target population, and the outcome to be predicted. | 1 |
| Abstract | 2 | D;V | Provide a summary of objectives, study design, setting, participants, sample size, predictors, outcome, statistical analysis, results, and conclusions. | 2 |
| **Introduction** | | | | |
| Background and objectives | 3a | D;V | Explain the medical context (including whether diagnostic or prognostic) and rationale for developing or validating the multivariable prediction model, including references to existing models. | 3 |
| 3b | D;V | Specify the objectives, including whether the study describes the development or validation of the model or both. | 3 |
| **Methods** | | | | |
| Source of data | 4a | D;V | Describe the study design or source of data (e.g., randomized trial, cohort, or registry data), separately for the development and validation data sets, if applicable. | 4 |
| 4b | D;V | Specify the key study dates, including start of accrual; end of accrual; and, if applicable, end of follow-up. | 2, 4 |
| Participants | 5a | D;V | Specify key elements of the study setting (e.g., primary care, secondary care, general population) including number and location of centers. | 4 |
| 5b | D;V | Describe eligibility criteria for participants. | 4 |
| 5c | D;V | Give details of treatments received, if relevant. | 4 |
| Outcome | 6a | D;V | Clearly define the outcome that is predicted by the prediction model, including how and when assessed. | 4, Table S2 |
| 6b | D;V | Report any actions to blind assessment of the outcome to be predicted. | NA |
| Predictors | 7a | D;V | Clearly define all predictors used in developing or validating the multivariable prediction model, including how and when they were measured. | 5, Table S3 |
| 7b | D;V | Report any actions to blind assessment of predictors for the outcome and other predictors. | NA |
| Sample size | 8 | D;V | Explain how the study size was arrived at. | 4, Fig. 1 |
| Missing data | 9 | D;V | Describe how missing data were handled (e.g., complete-case analysis, single imputation, multiple imputation) with details of any imputation method. | 4 |
| Statistical analysis methods | 10a | D | Describe how predictors were handled in the analyses. | 5, 6 |
| 10b | D | Specify type of model, all model-building procedures (including any predictor selection), and method for internal validation. | 6 |
| 10c | V | For validation, describe how the predictions were calculated. | 6, 7 |
| 10d | D;V | Specify all measures used to assess model performance and, if relevant, to compare multiple models. | 6, 7 |
| 10e | V | Describe any model updating (e.g., recalibration) arising from the validation, if done. | 7 (for Homer and HAS-BLED) |
| Risk groups | 11 | D;V | Provide details on how risk groups were created, if done. | 6, 7 |
| Development vs. validation | 12 | V | For validation, identify any differences from the development data in setting, eligibility criteria, outcome, and predictors. | 6 |
| **Results** | | | | |
| Participants | 13a | D;V | Describe the flow of participants through the study, including the number of participants with and without the outcome and, if applicable, a summary of the follow-up time. A diagram may be helpful. | 8, Table 3 |
| 13b | D;V | Describe the characteristics of the participants (basic demographics, clinical features, available predictors), including the number of participants with missing data for predictors and outcome. | 8,  Figure 1, Table 1 (p19, 20) |
| 13c | V | For validation, show a comparison with the development data of the distribution of important variables (demographics, predictors and outcome). | Table 1 (p19, 20) |
| Model development | 14a | D | Specify the number of participants and outcome events in each analysis. | 8 |
| 14b | D | If done, report the unadjusted association between each candidate predictor and outcome. | NA |
| Model specification | 15a | D | Present the full prediction model to allow predictions for individuals (i.e., all regression coefficients, and model intercept or baseline survival at a given time point). | Table 2 (p20,21) |
| 15b | D | Explain how to the use the prediction model. | 11, 12 |
| Model performance | 16 | D;V | Report performance measures (with CIs) for the prediction model. | 8, 9, Table 3 (p 22-23) |
| Model-updating | 17 | V | If done, report the results from any model updating (i.e., model specification, model performance). | NA |
| **Discussion** | | | | |
| Limitations | 18 | D;V | Discuss any limitations of the study (such as nonrepresentative sample, few events per predictor, missing data). | 13, 14 |
| Interpretation | 19a | V | For validation, discuss the results with reference to performance in the development data, and any other validation data. | 10, 11, 12 |
| 19b | D;V | Give an overall interpretation of the results, considering objectives, limitations, results from similar studies, and other relevant evidence. | 11, 12, 13, 14 |
| Implications | 20 | D;V | Discuss the potential clinical use of the model and implications for future research. | 11, 12 |
| **Other information** | | | | |
| Supplementary information | 21 | D;V | Provide information about the availability of supplementary resources, such as study protocol, Web calculator, and data sets. | Supplement |
| Funding | 22 | D;V | Give the source of funding and the role of the funders for the present study. | 14 |
